# Supplementary material for: The Combination of Δ9-Tetrahydrocannabinol and Cannabidiol Suppresses Mitochondrial Respiration of Human Glioblastoma Cells via Downregulation of Specific Respiratory Chain Proteins
Source: MDPI journal article supplement (doi:10.3390/cancers14133129), 2022-06-26

Fig. 1G

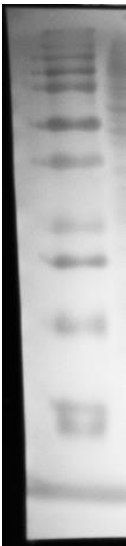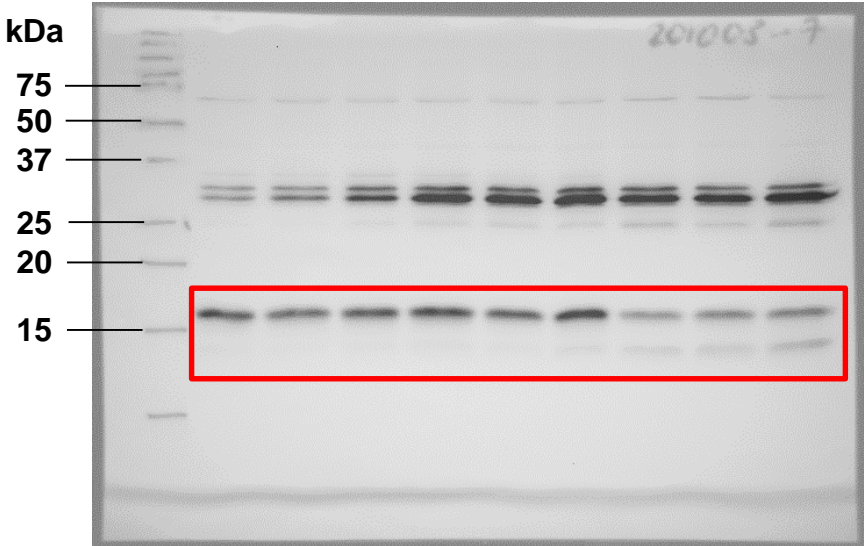

LC3A/B-I (MW: 16 kDa)  
LC3A/B-II (MW: 14 kDa)

|                  |   |     |     |     |     |     |     |     |     |
|------------------|---|-----|-----|-----|-----|-----|-----|-----|-----|
| [THC] ( $\mu$ M) | - | 1.0 | -   | 1.0 | 2.5 | -   | 2.5 | 5.0 | -   |
| [CBD] ( $\mu$ M) | - | -   | 1.0 | 1.0 | -   | 2.5 | 2.5 | -   | 5.0 |

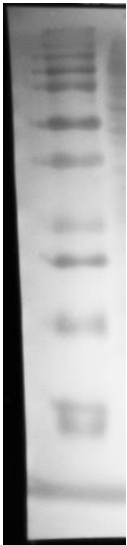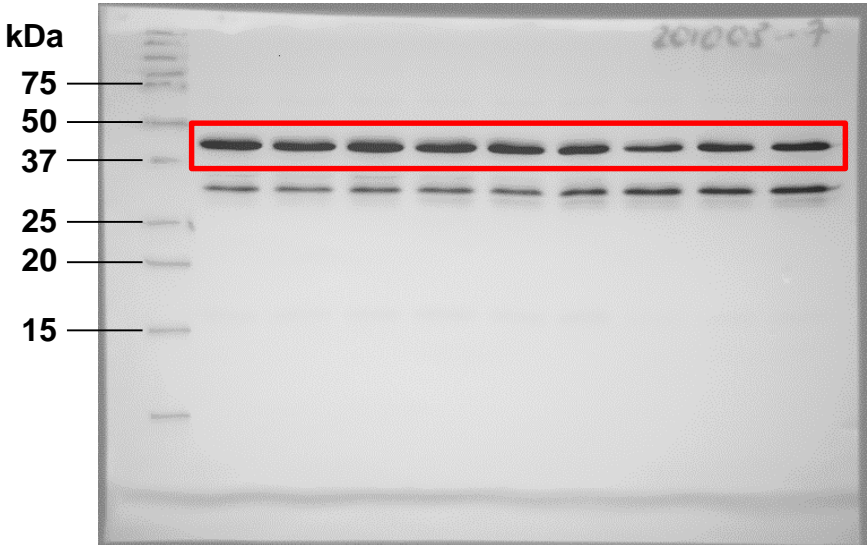

$\beta$ -actin (MW: 42 kDa)

Fig. 1H

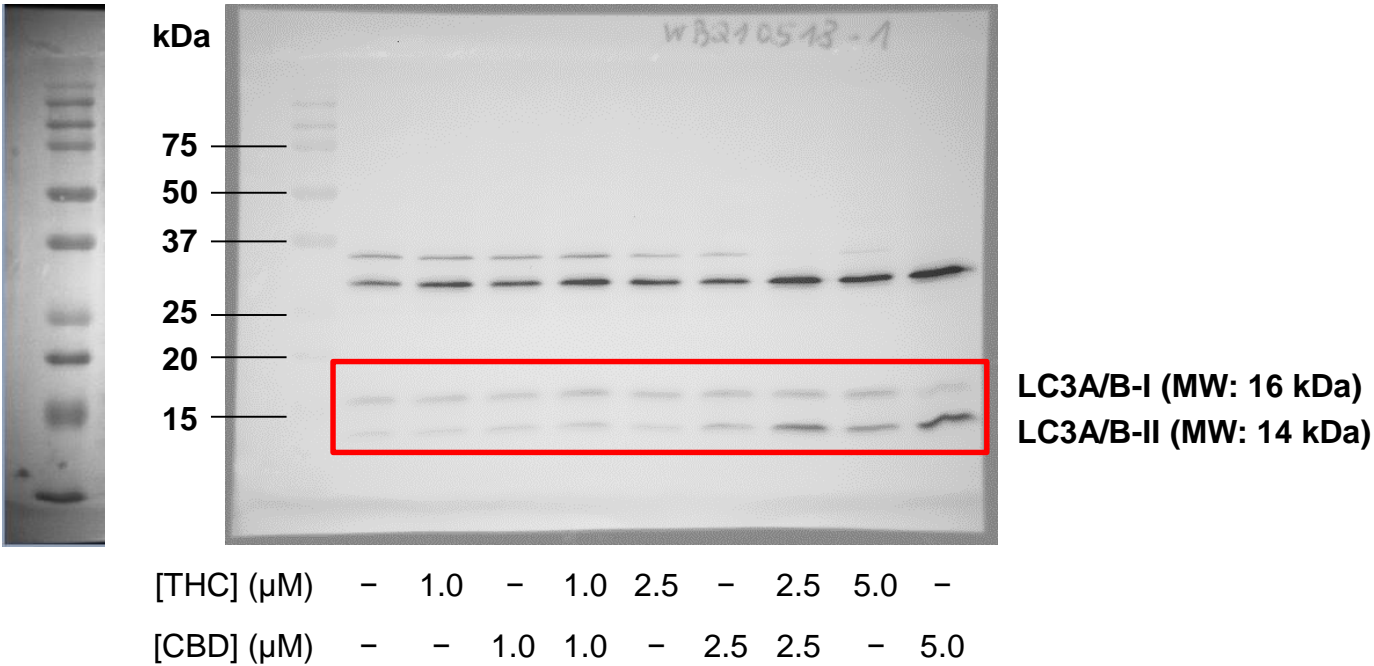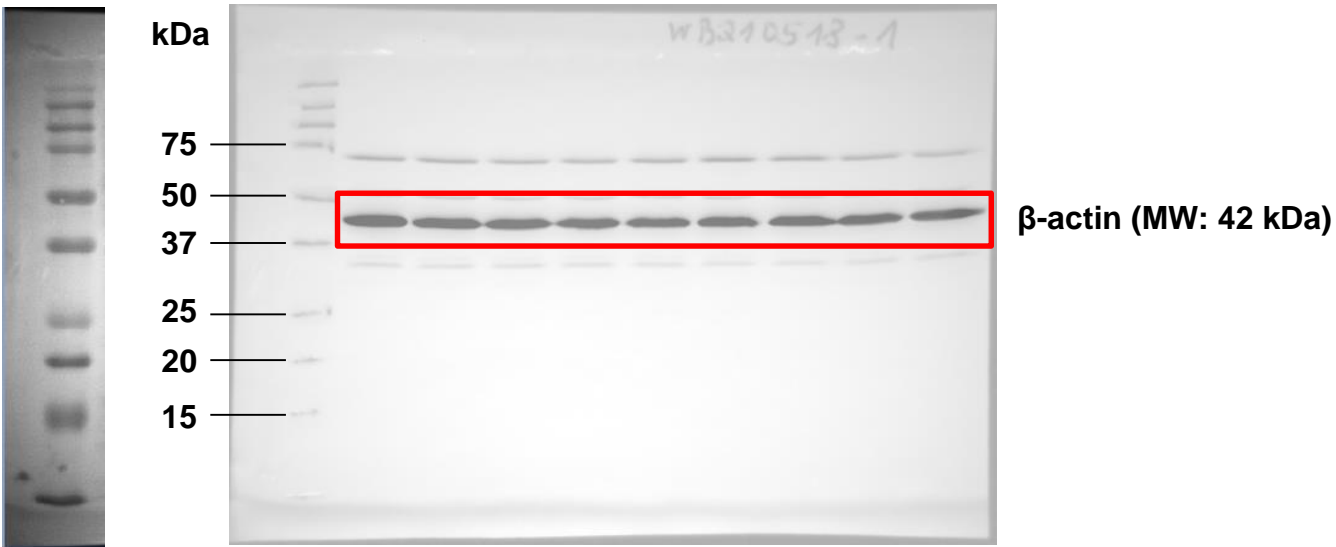

**Fig. 3G left side**

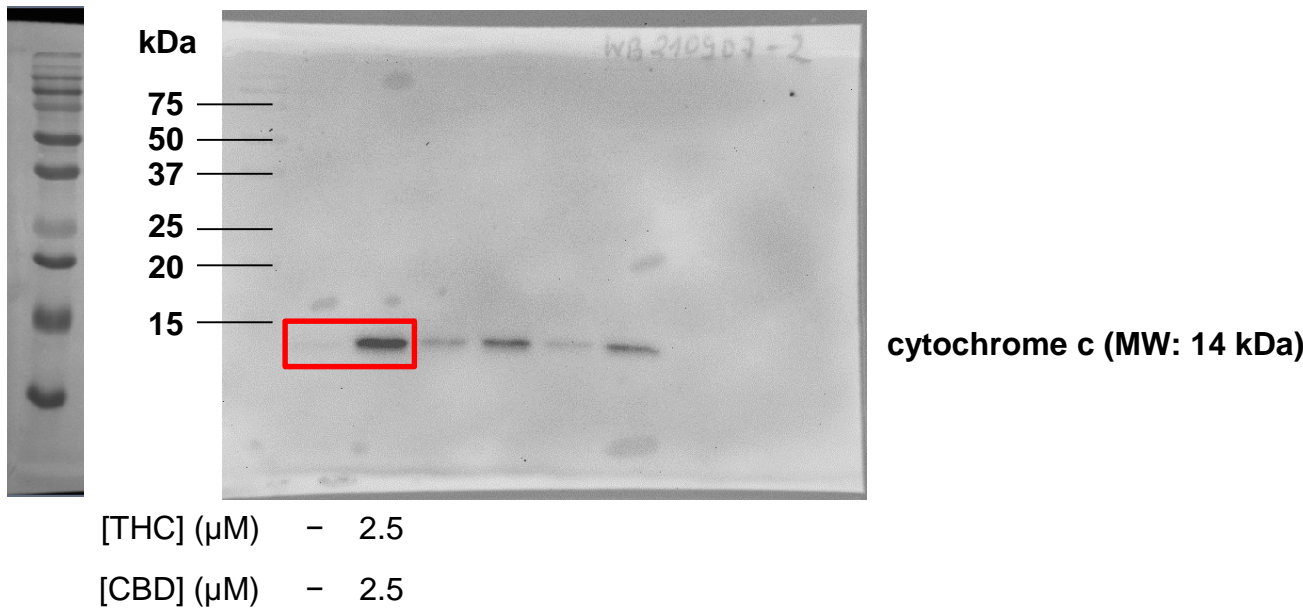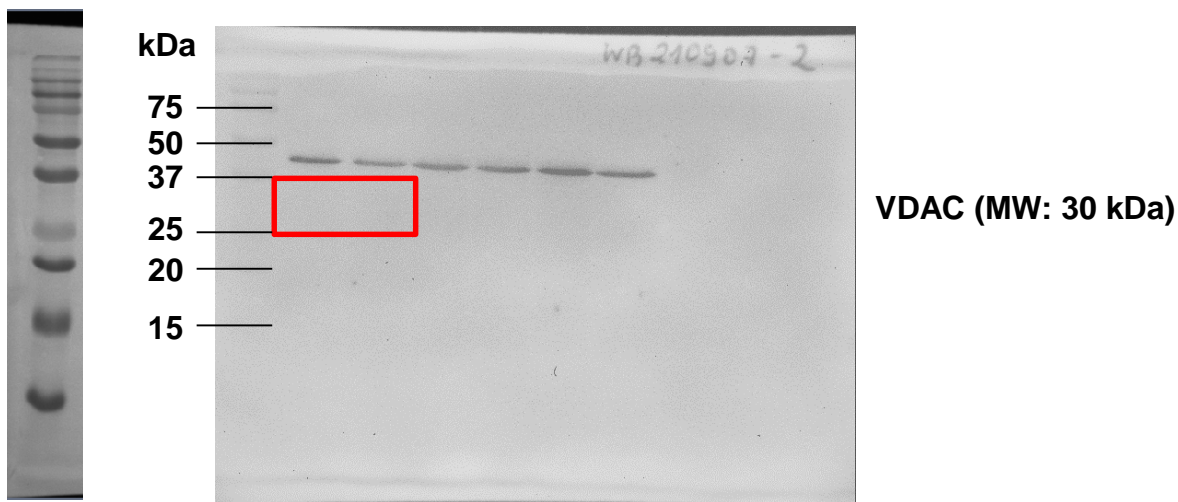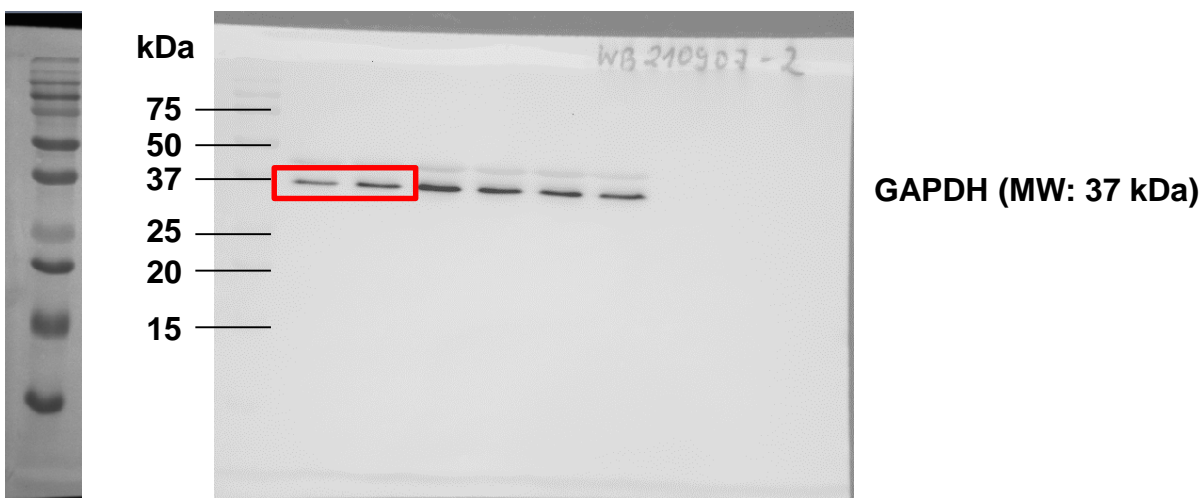

**Fig. 3G right side**

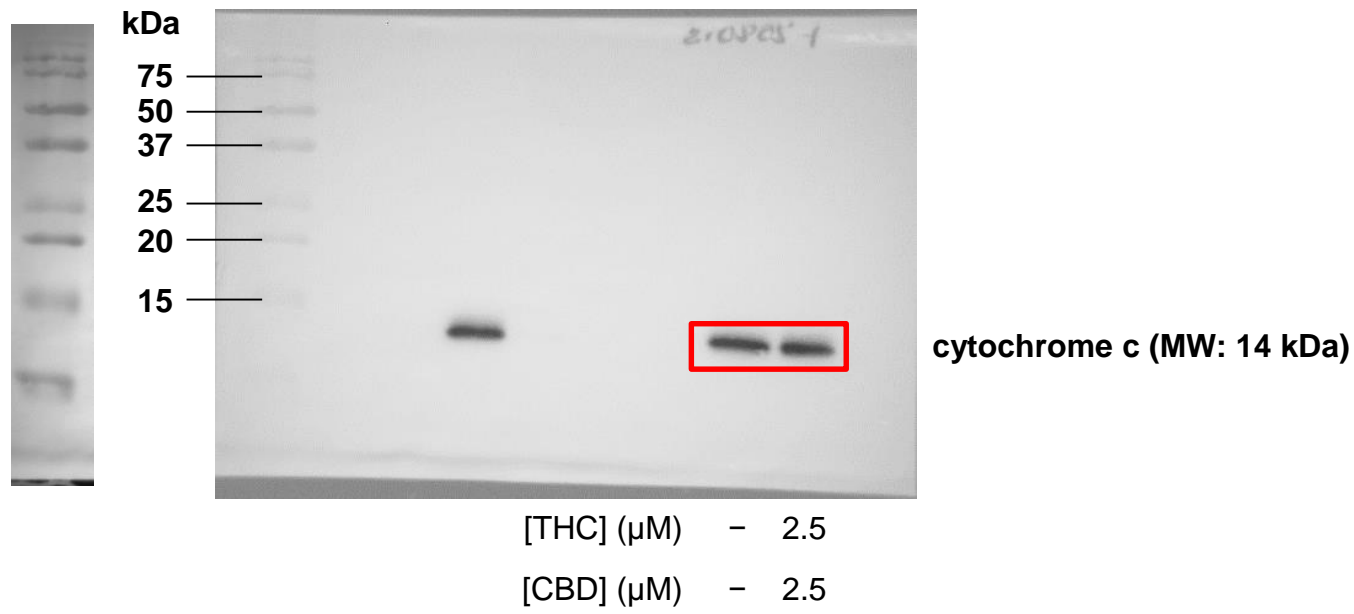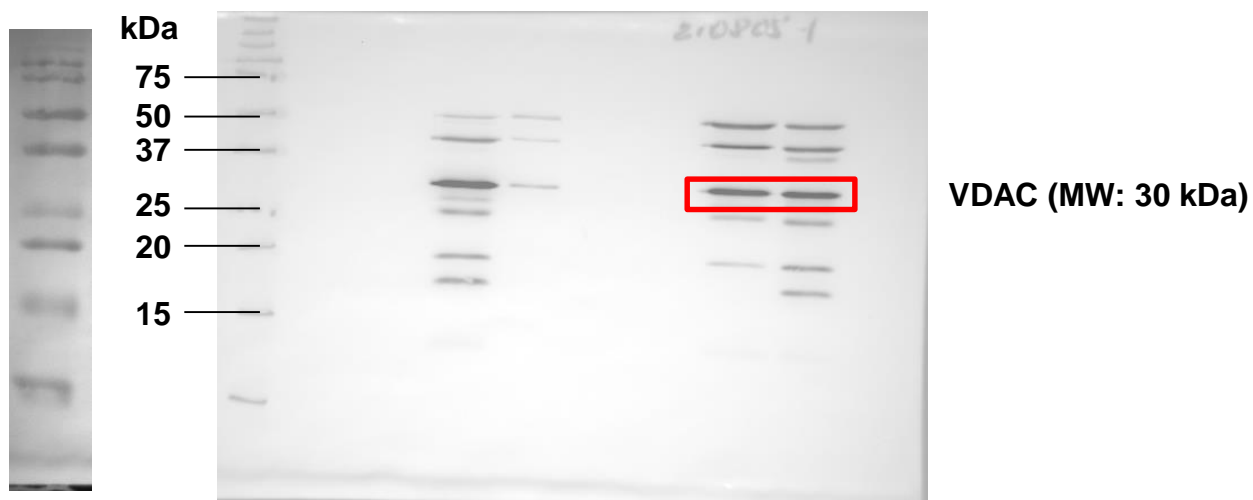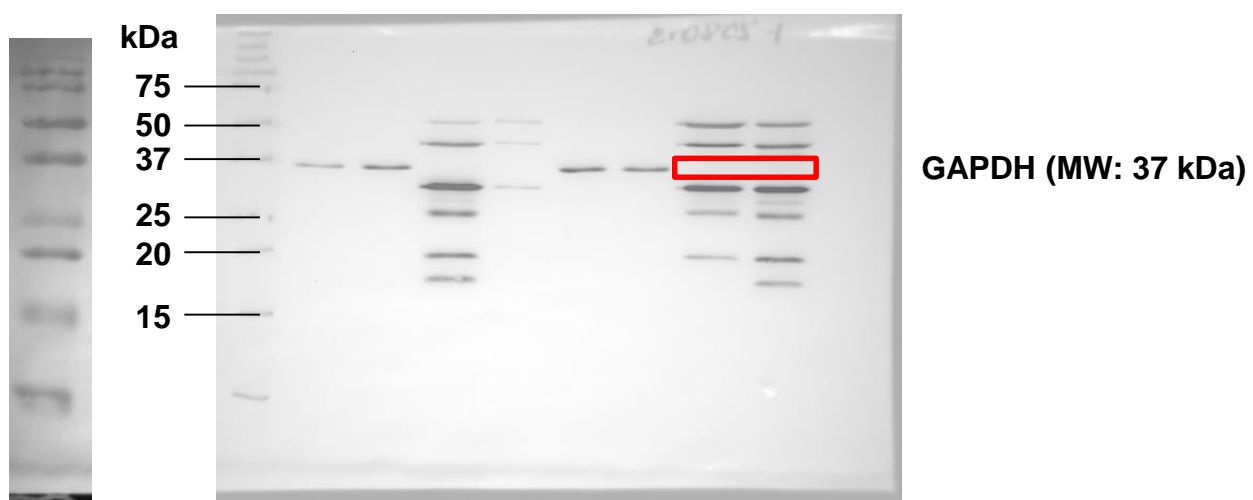

**Fig. 3H left side**

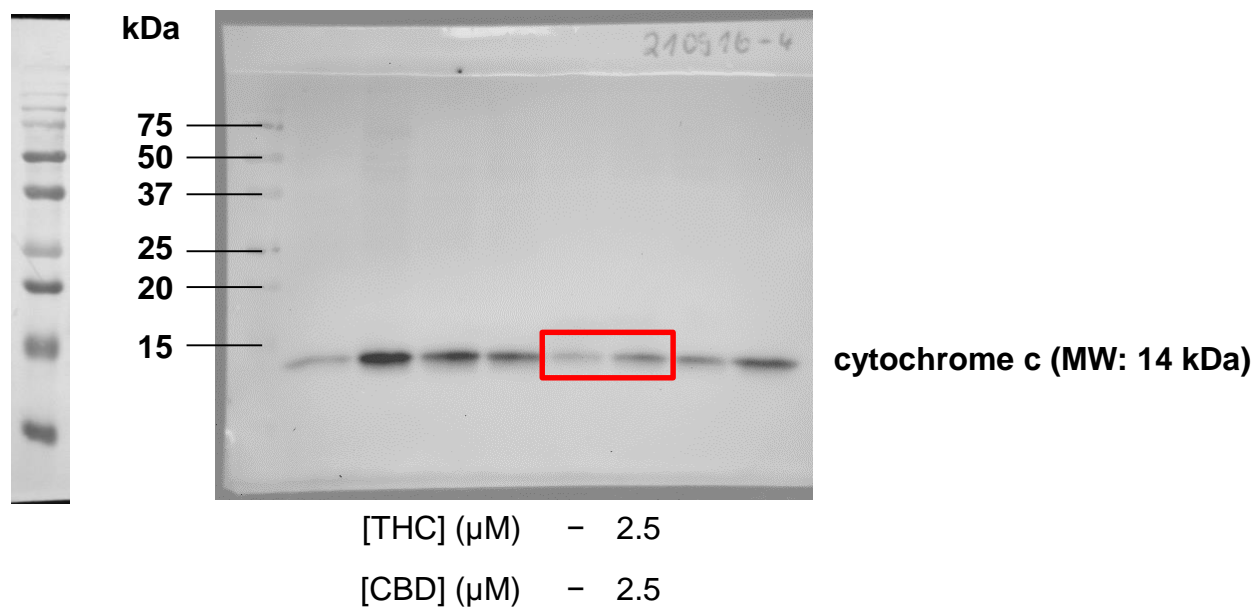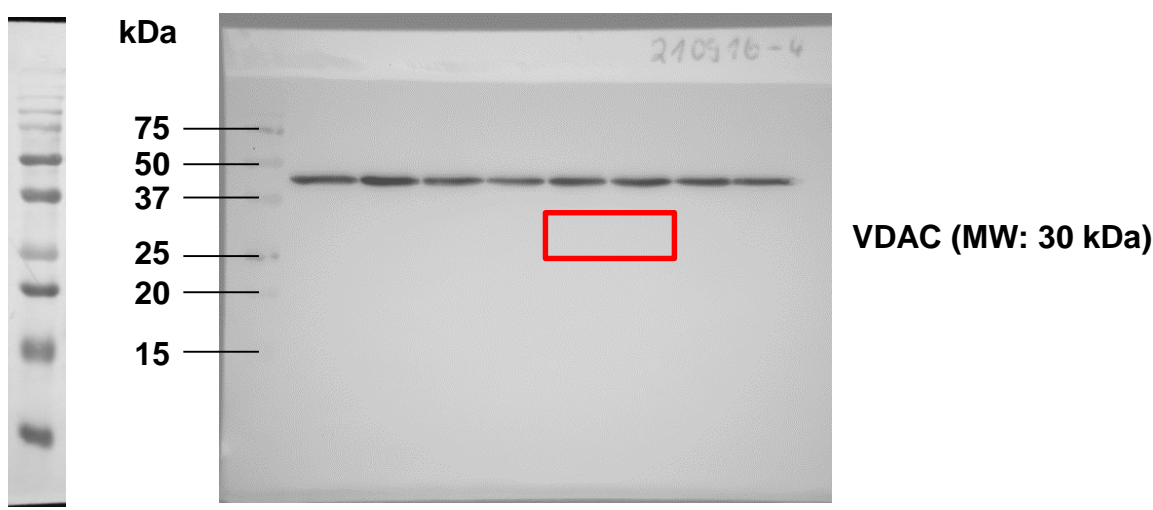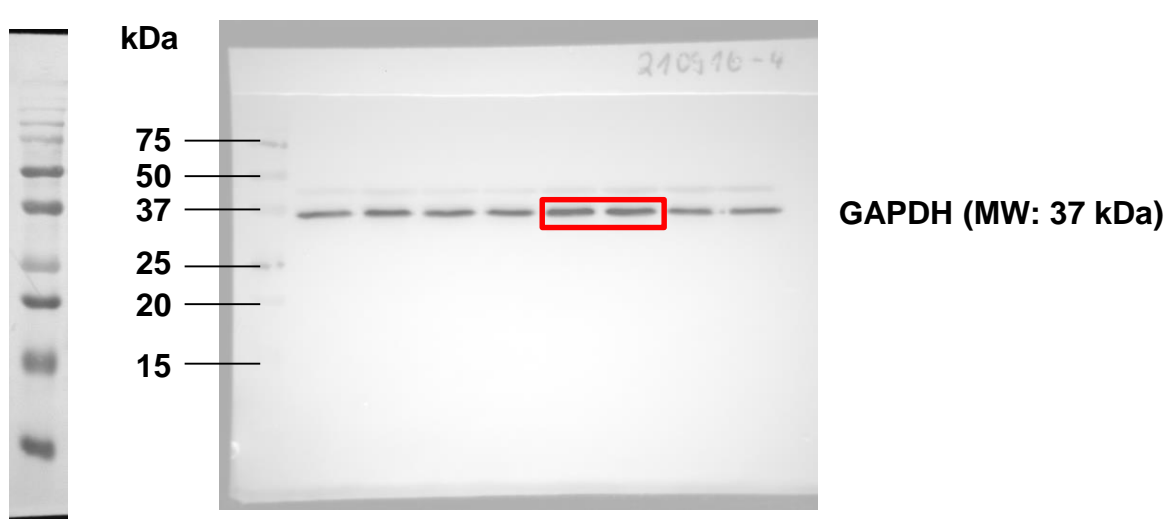



**Fig. 3H right side**

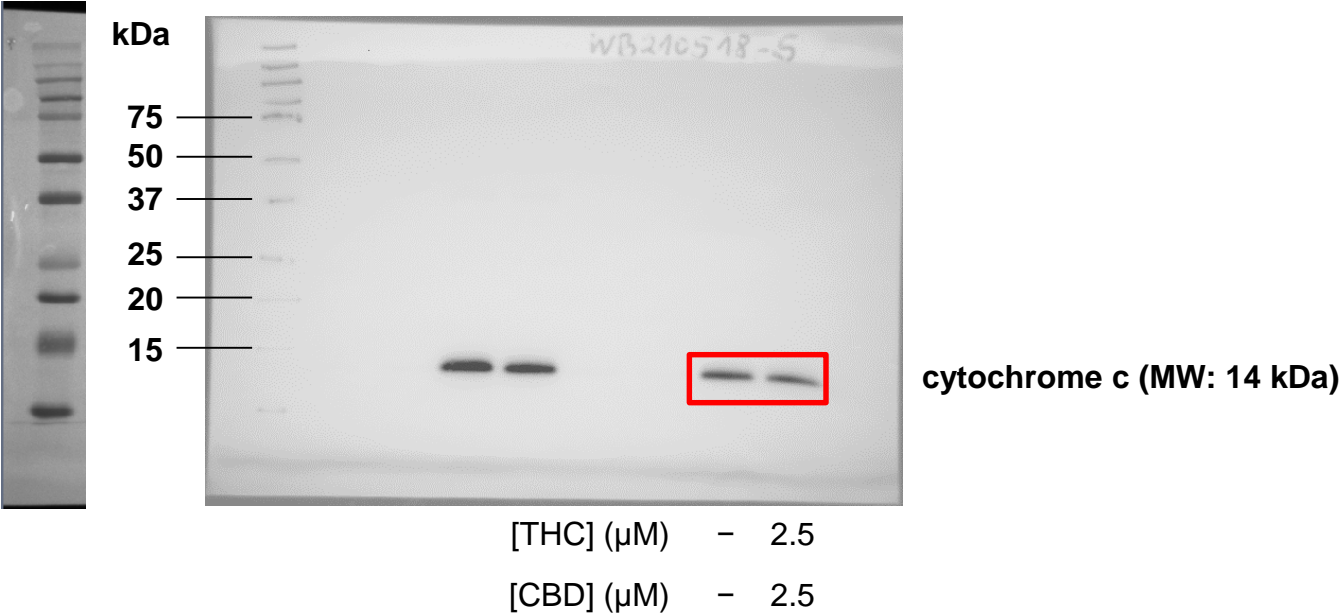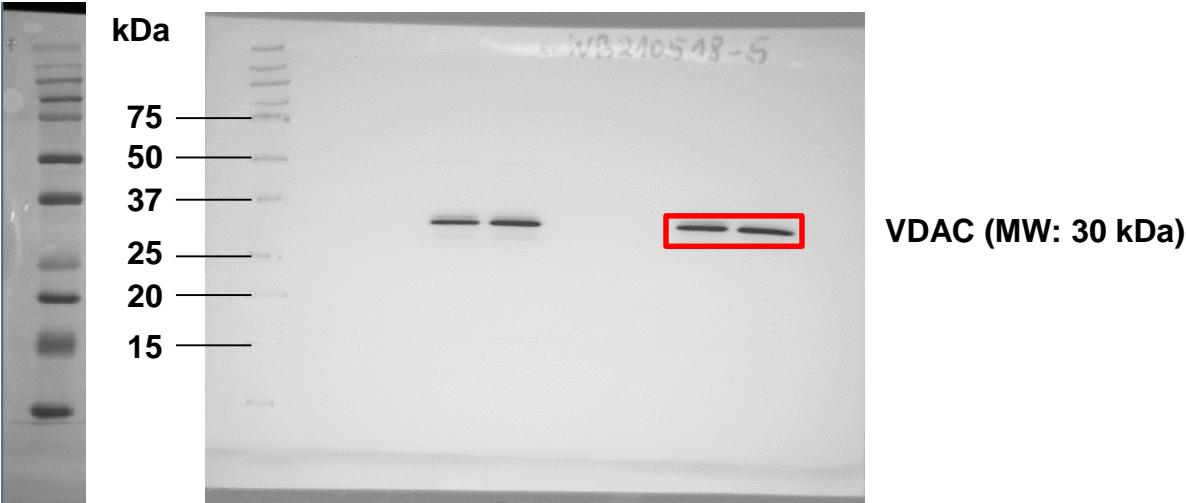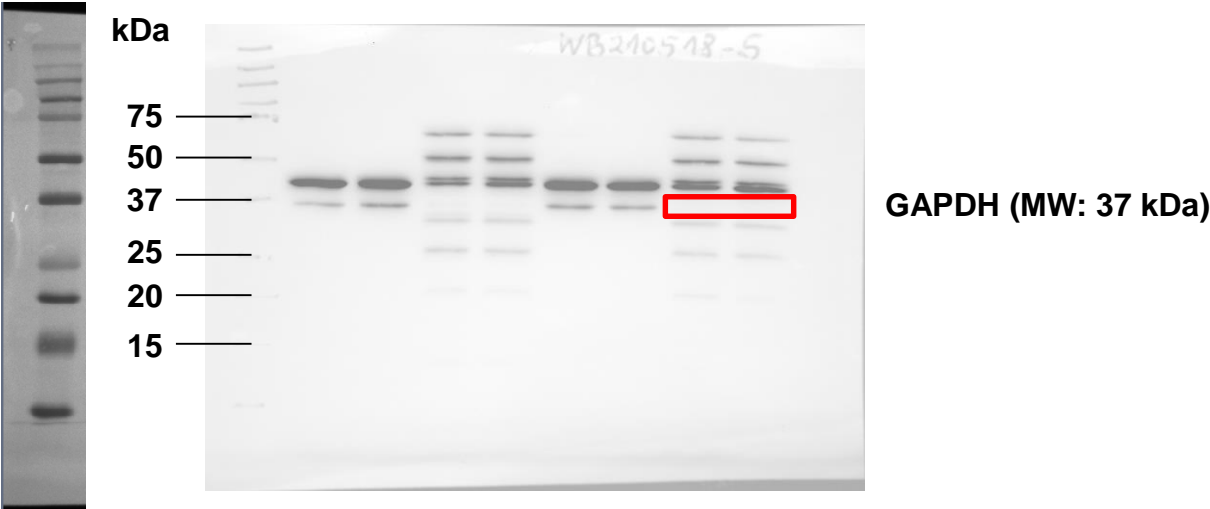

Fig. 4A

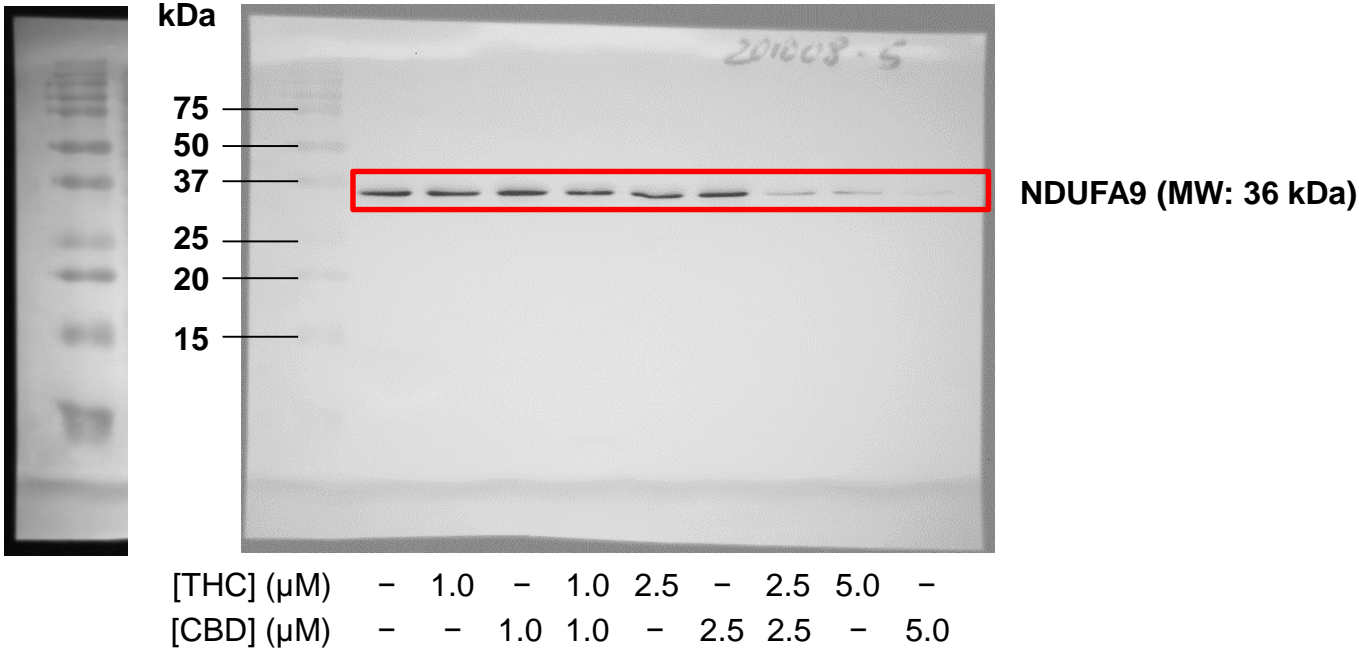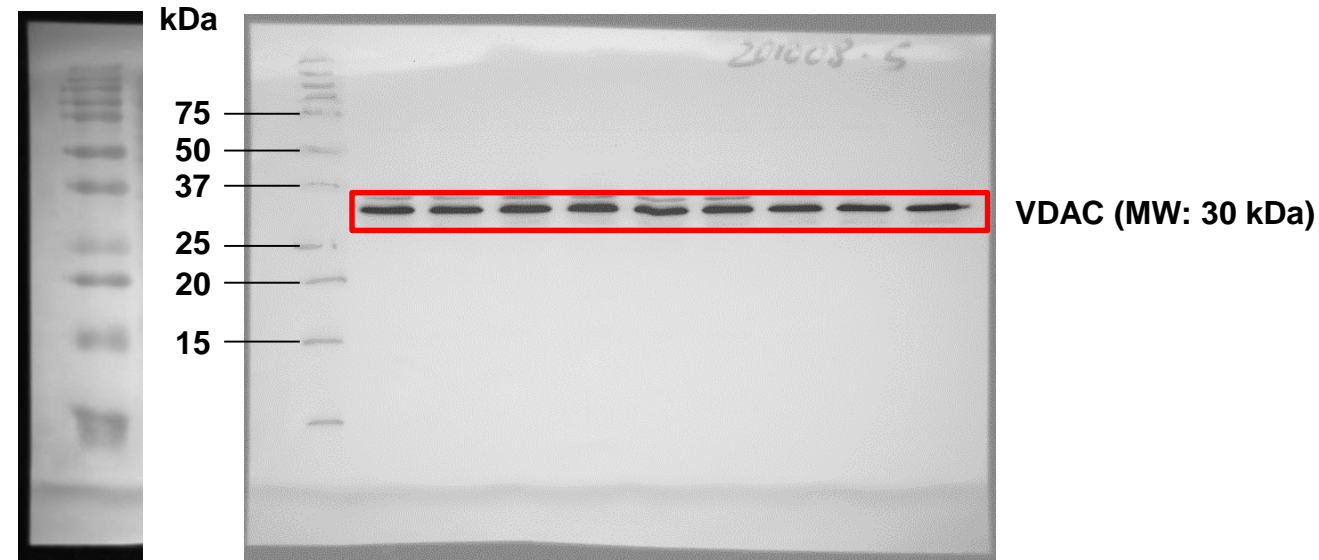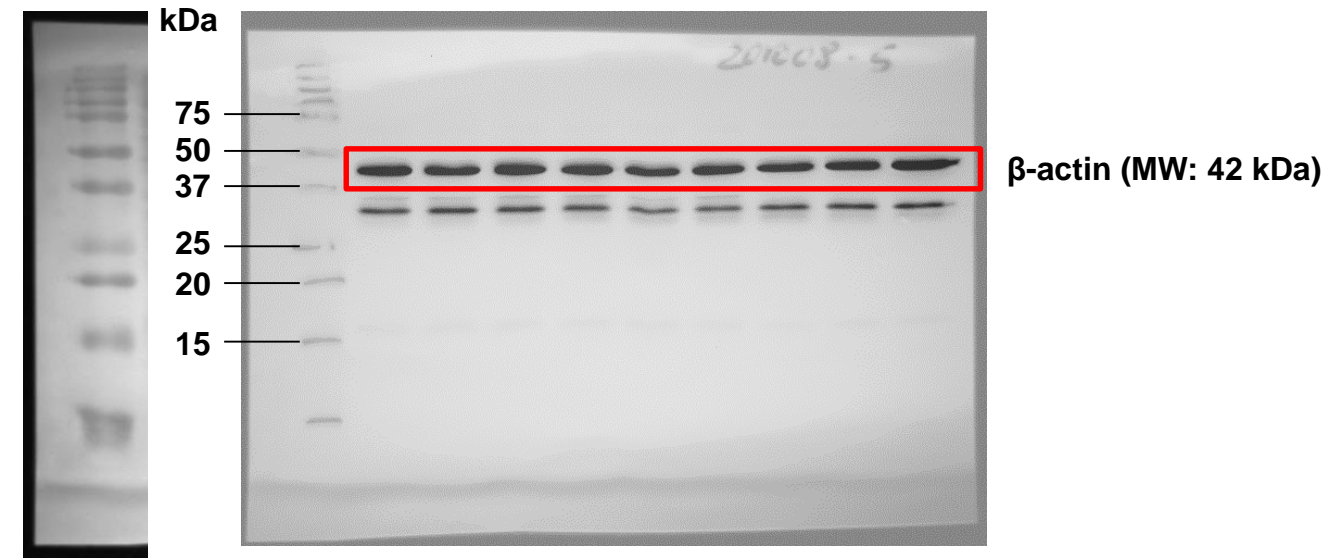

Fig. 4A cont.

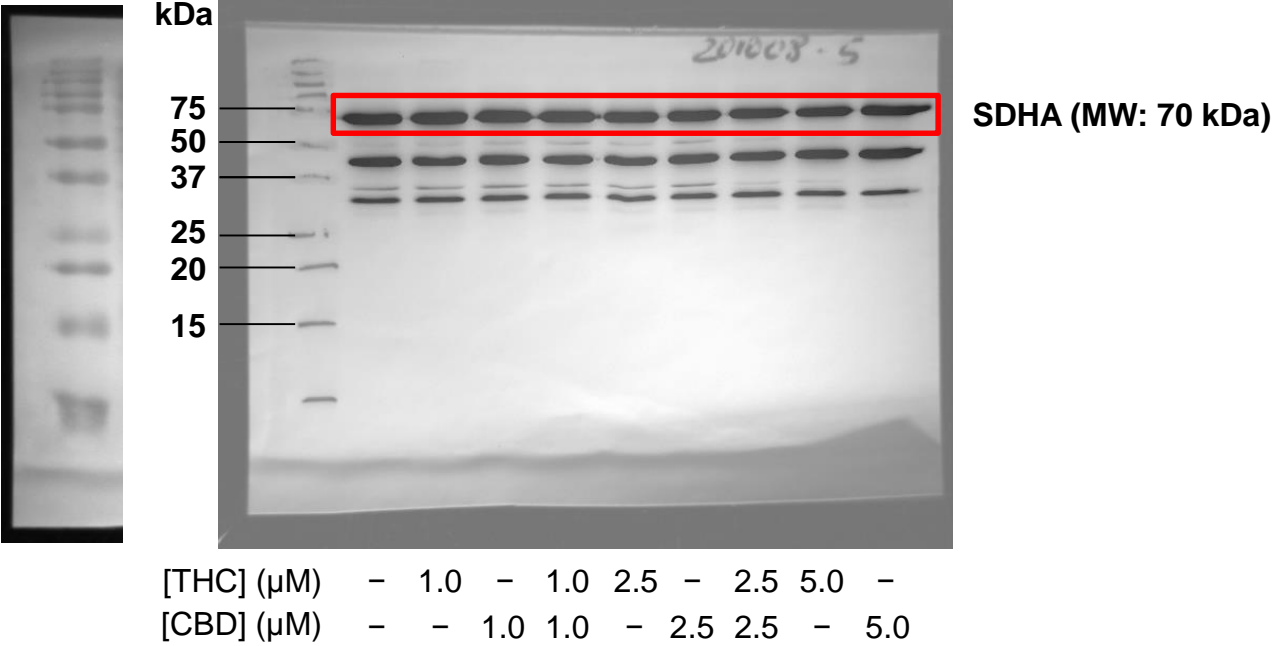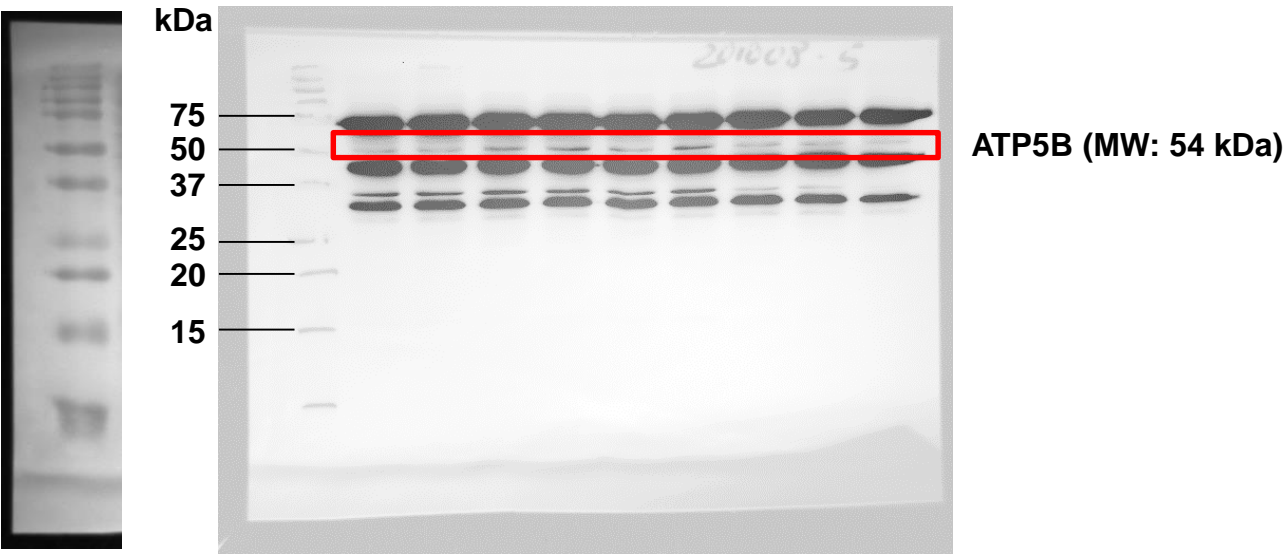



Fig. 4B

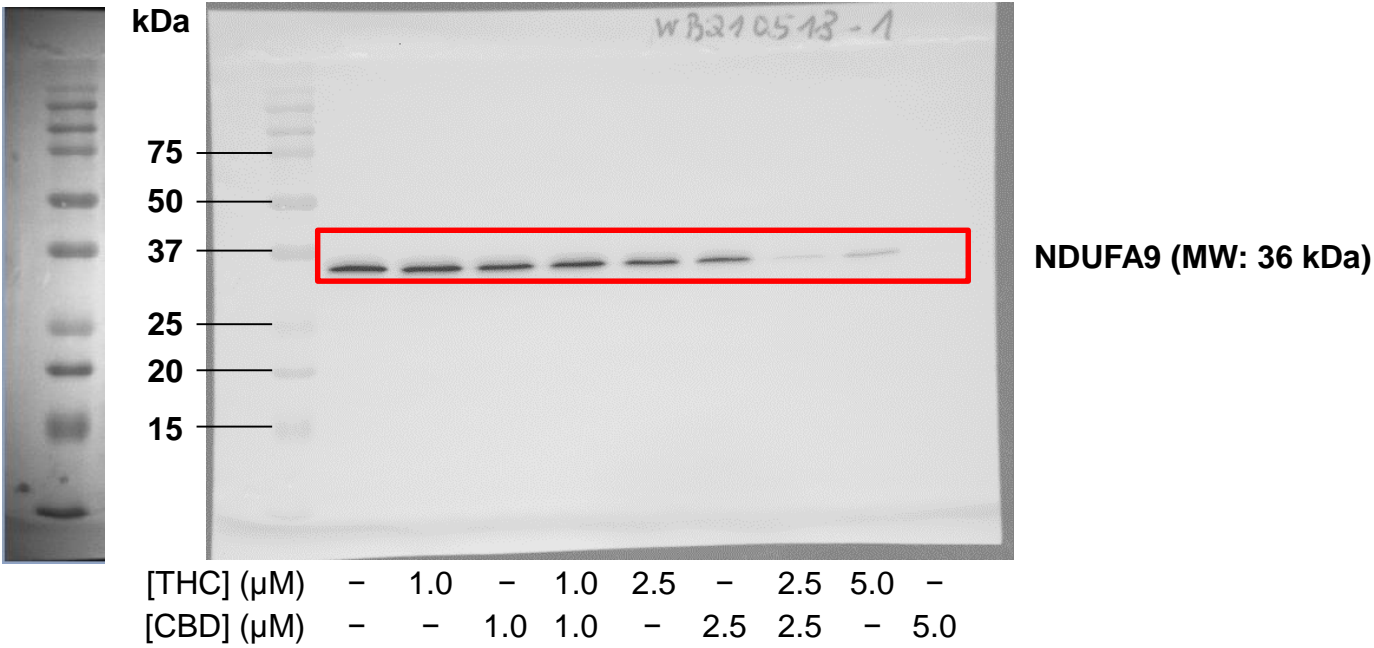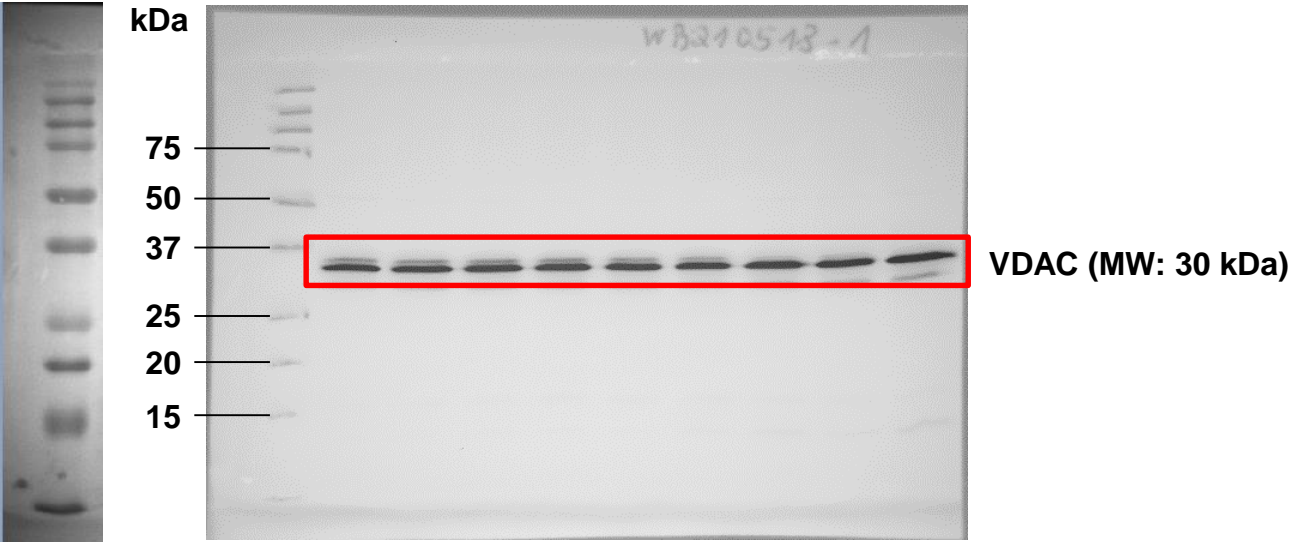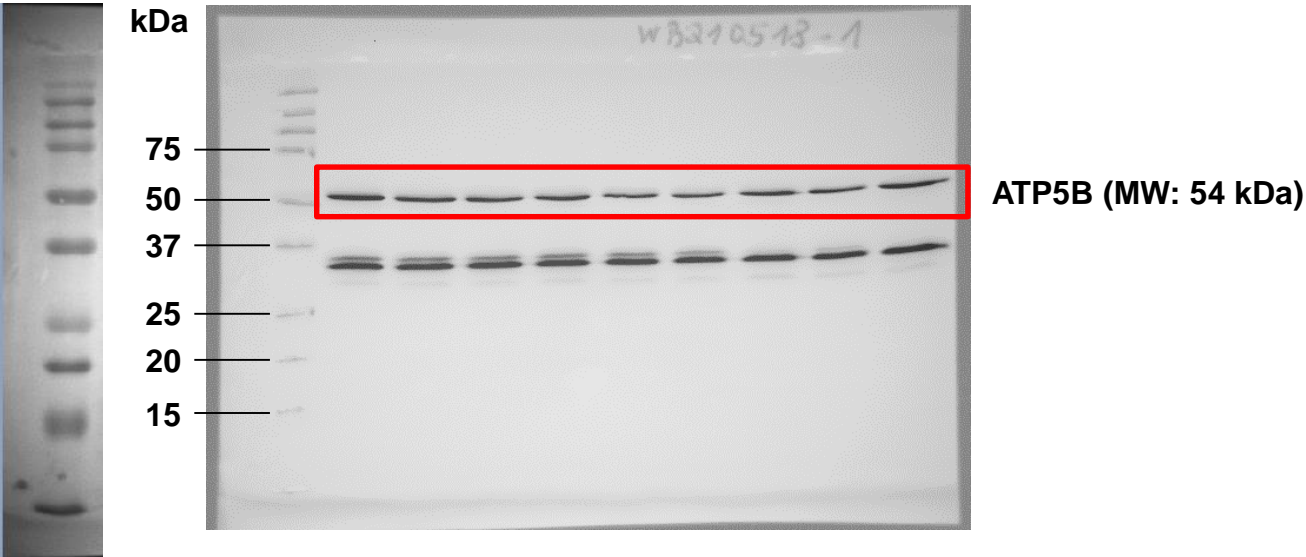

Fig. 4B cont.

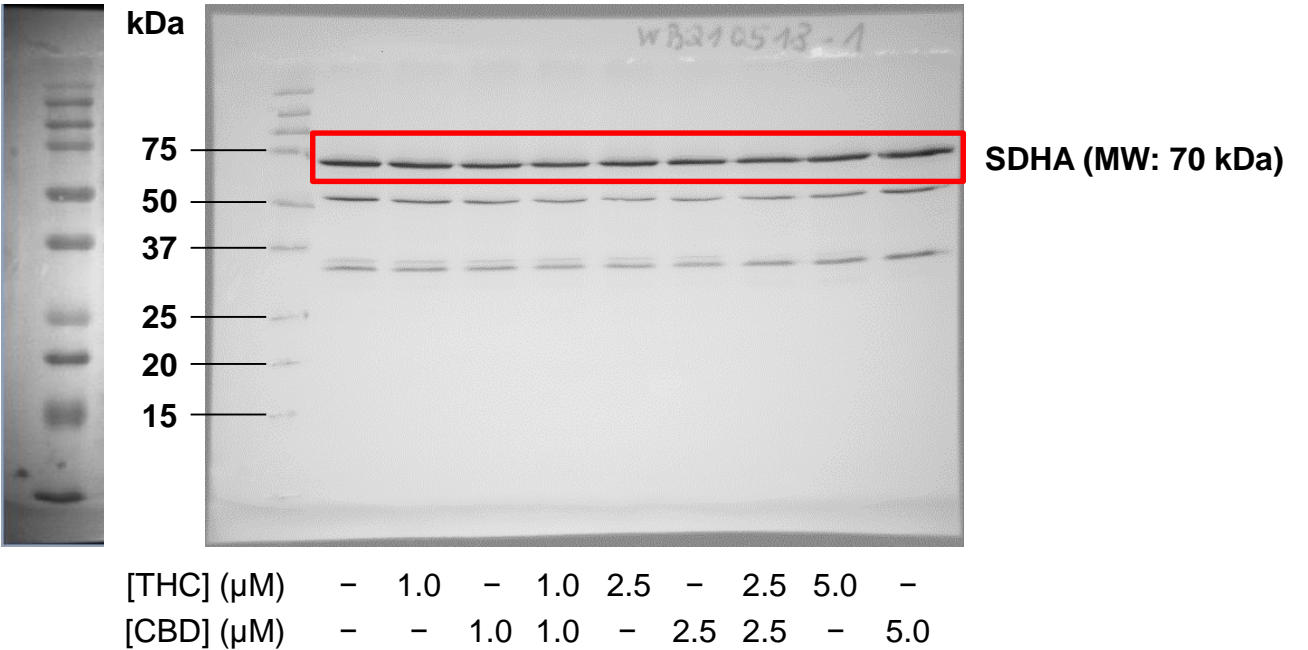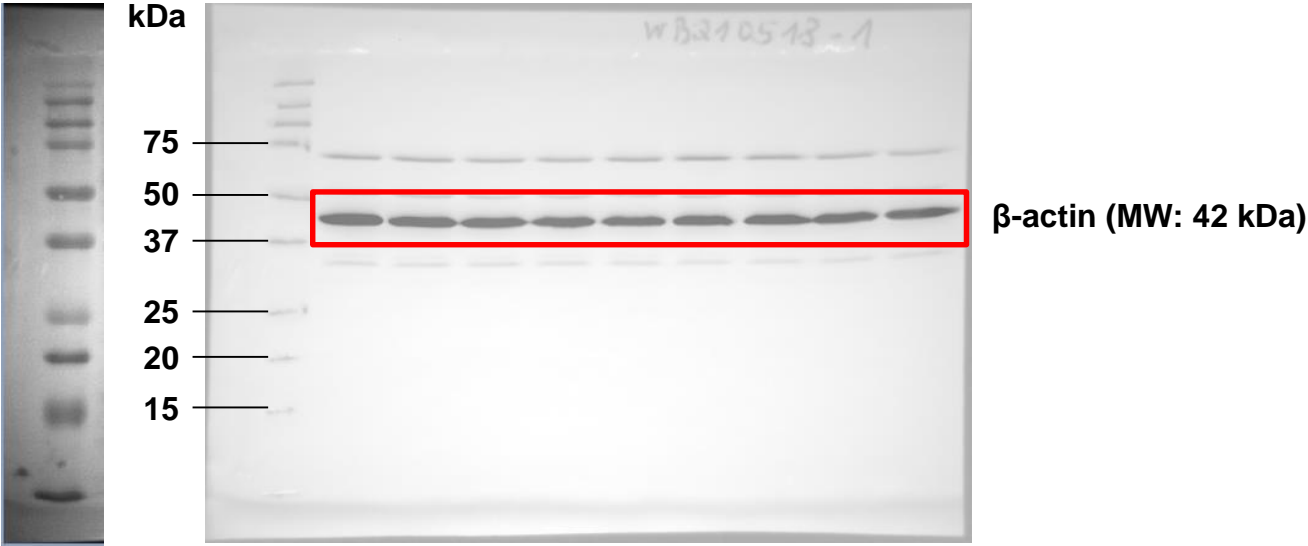

Fig. 4C

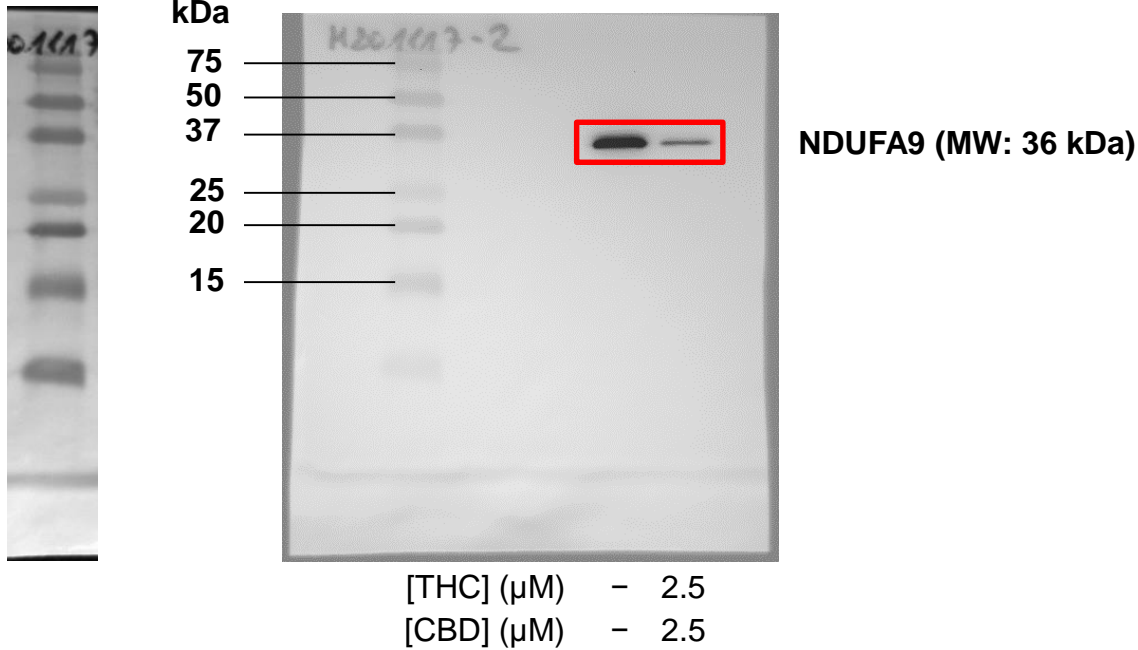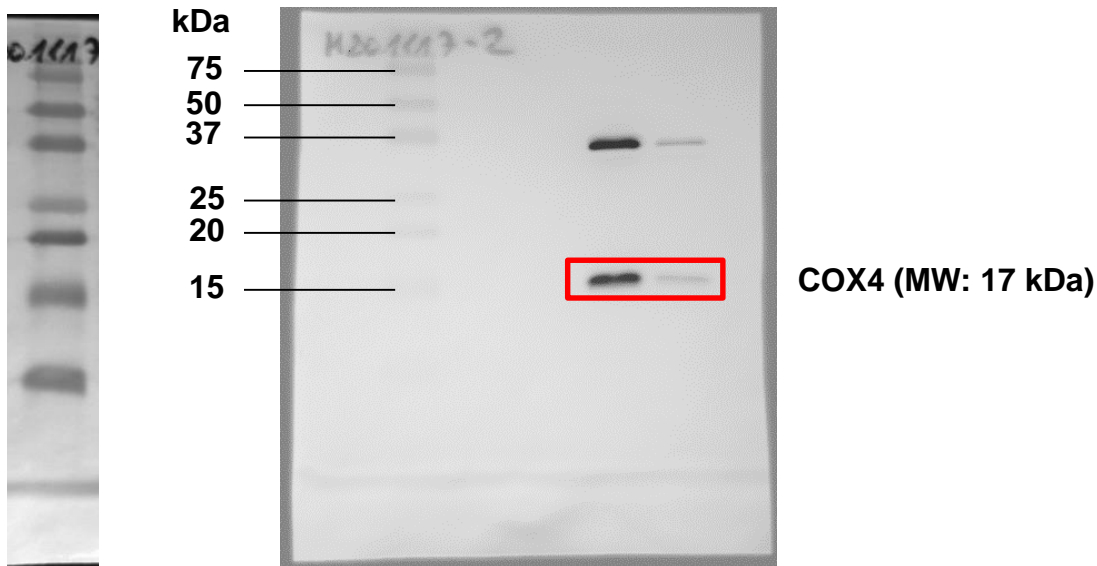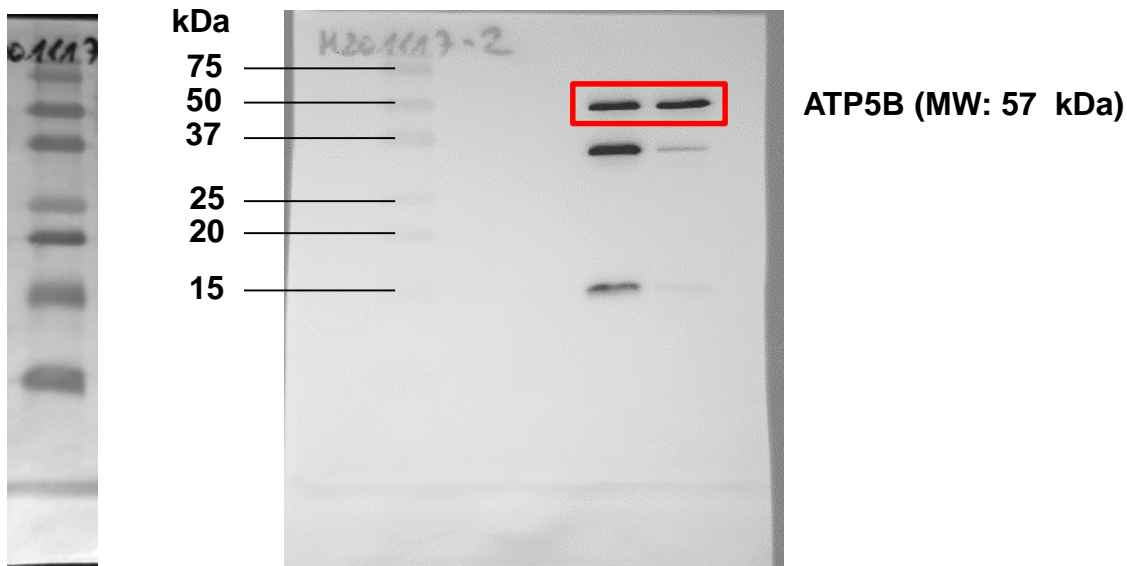

Fig. 4C cont.

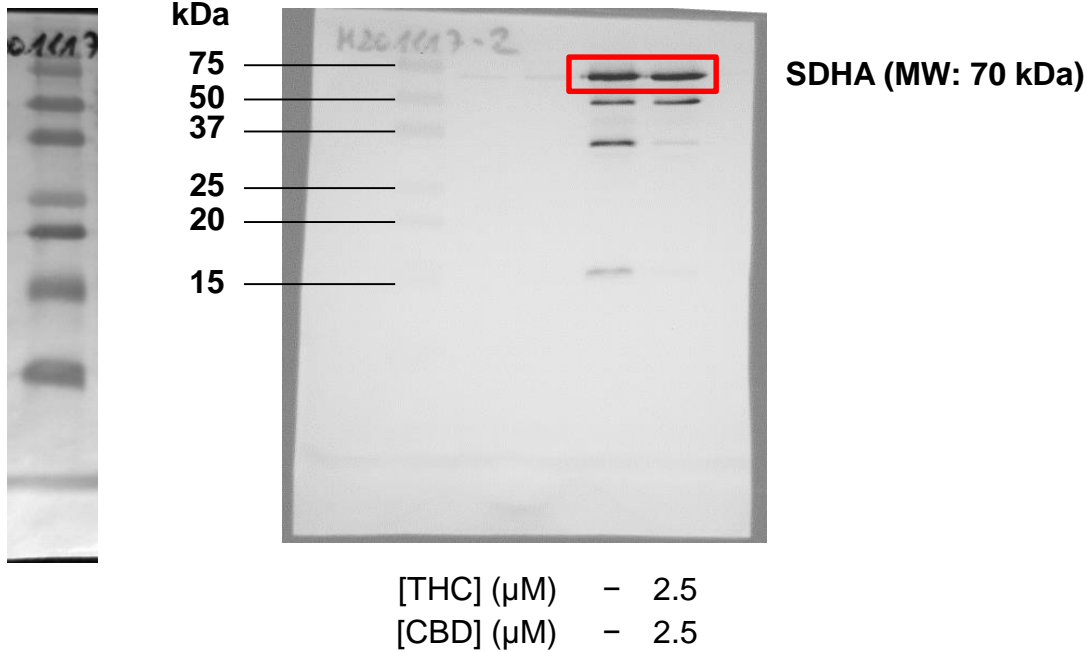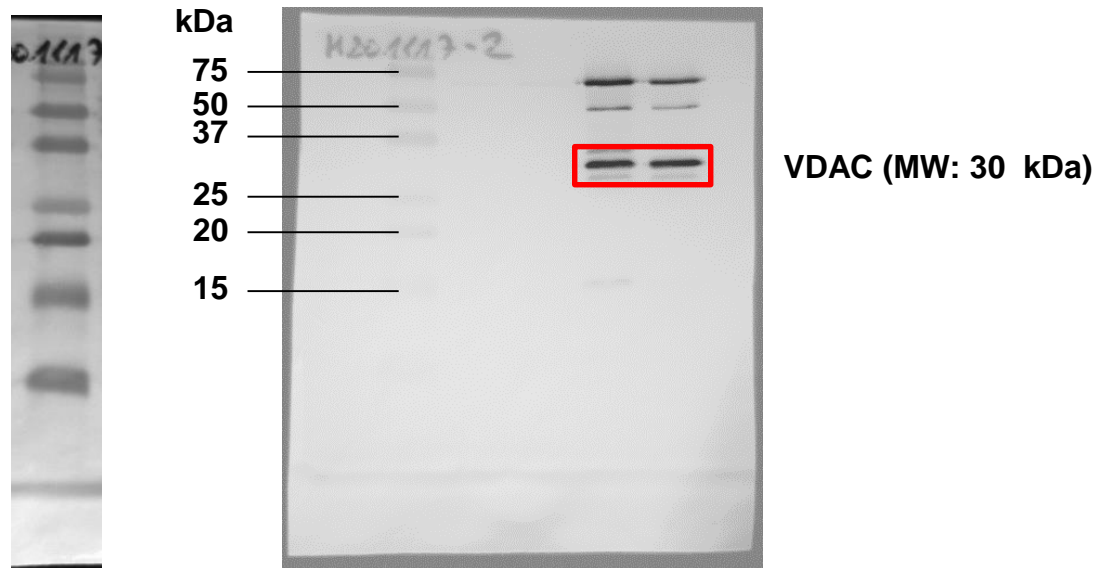



Fig. 4D

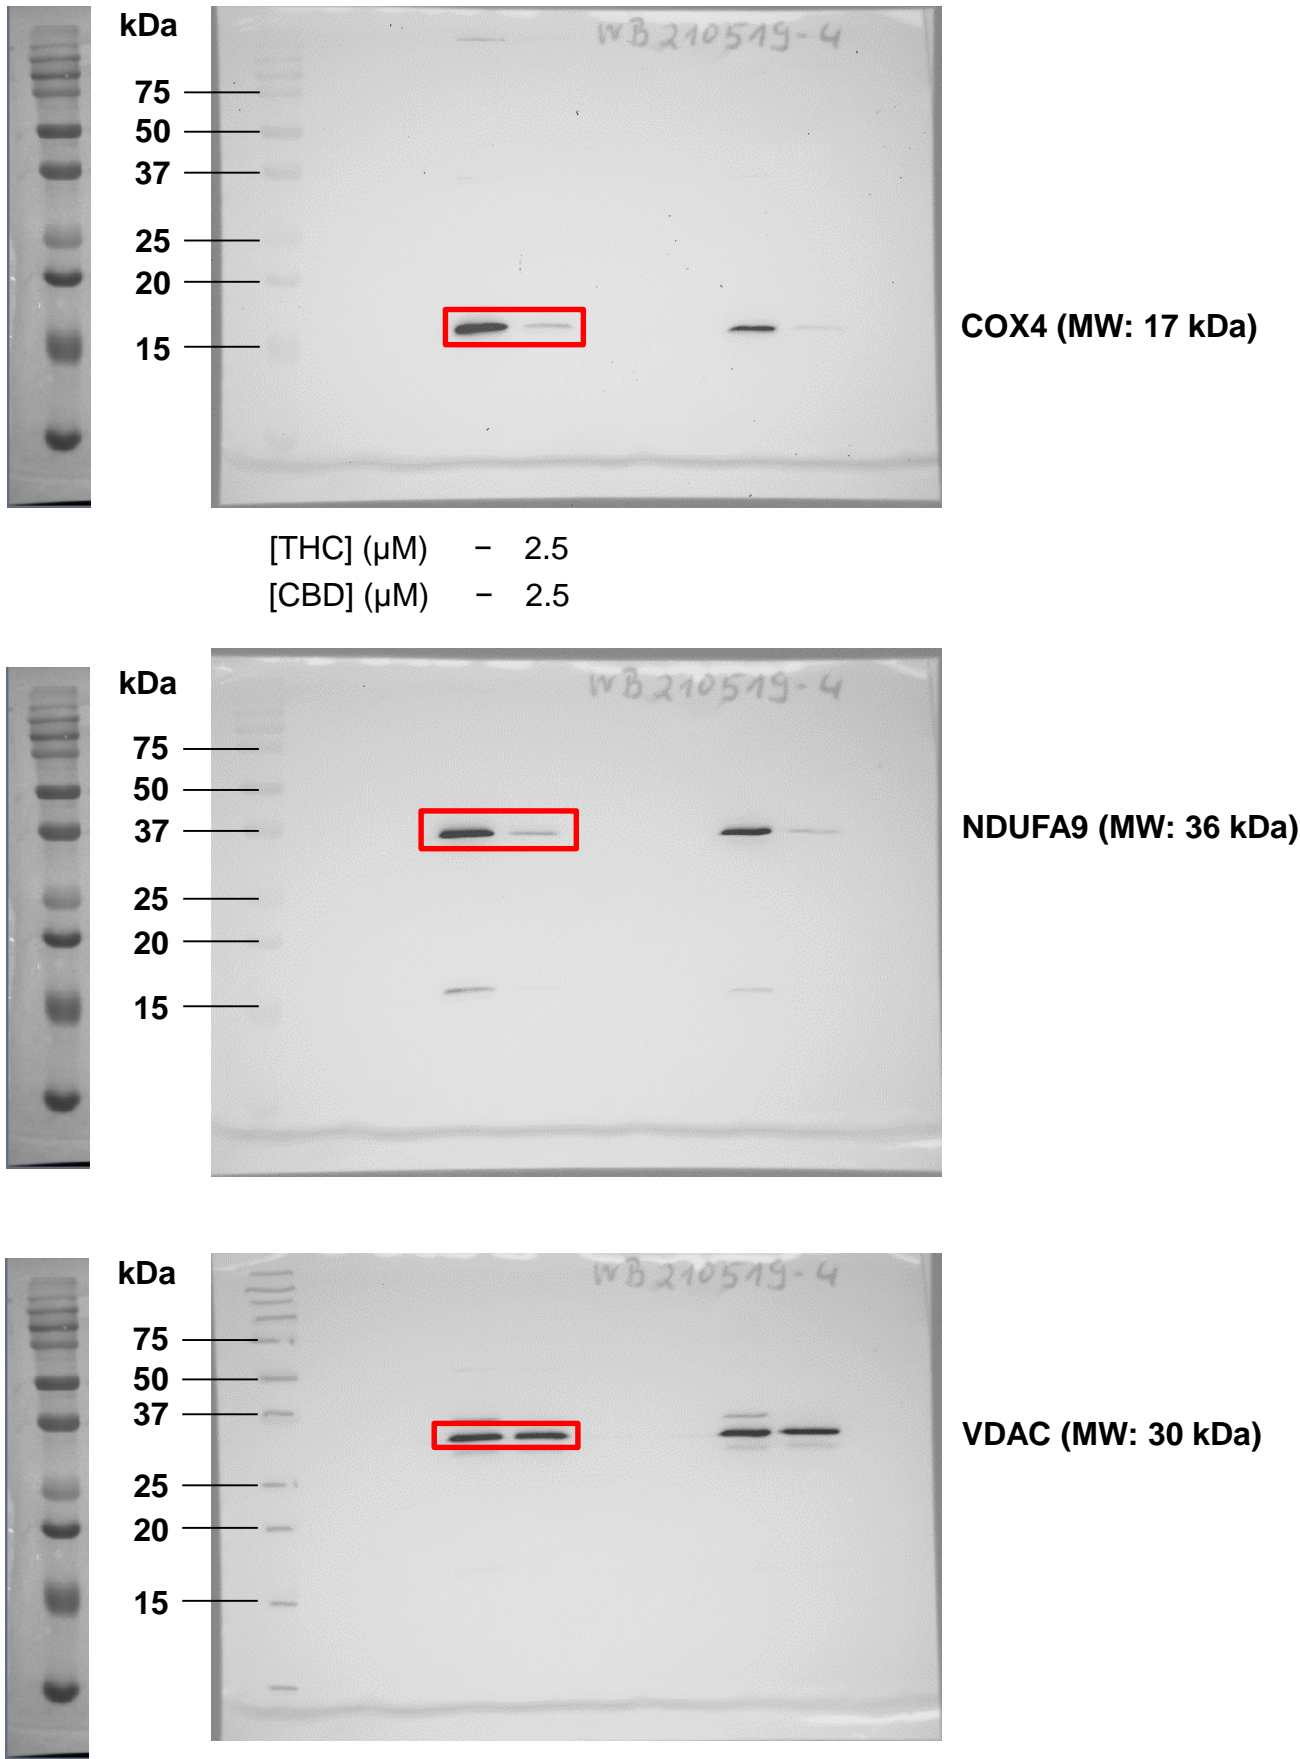



Fig. 4D cont.

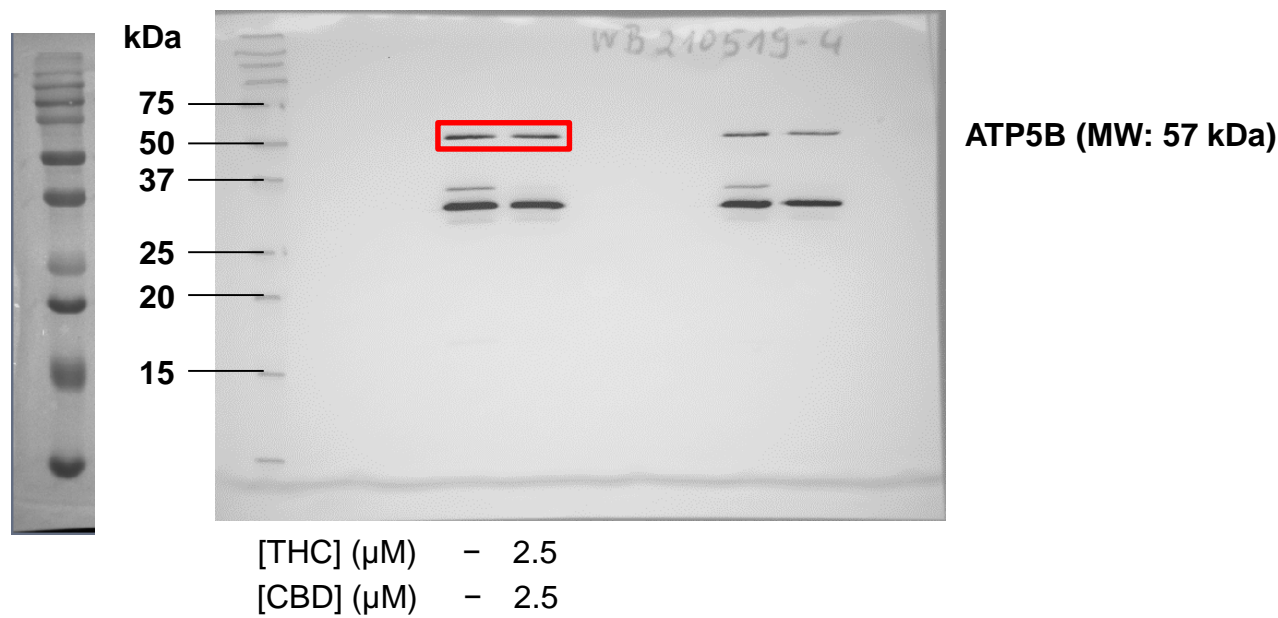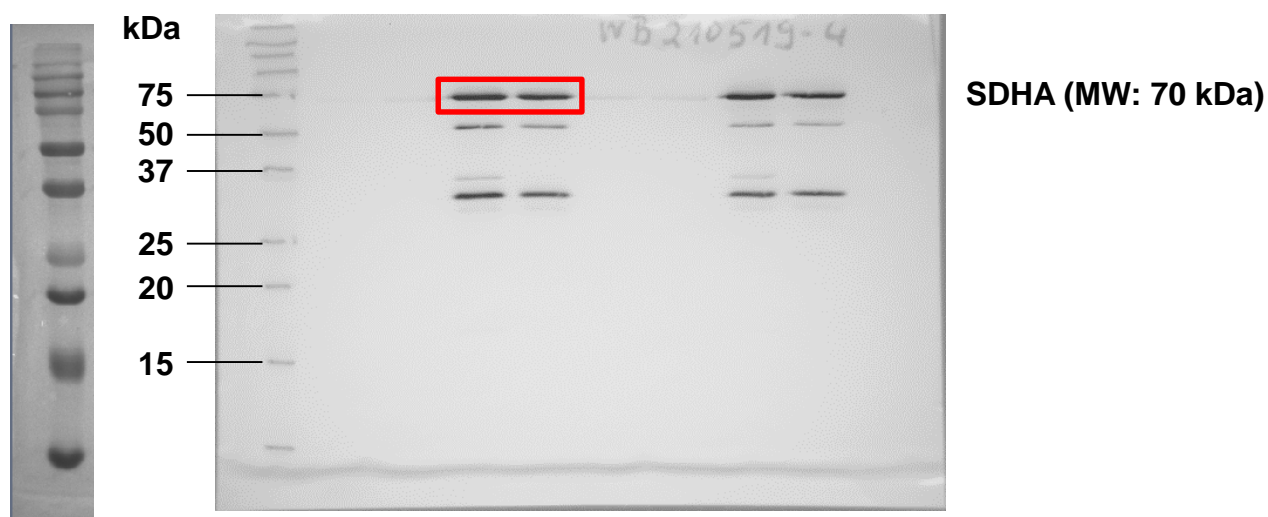

**Fig. 4E**

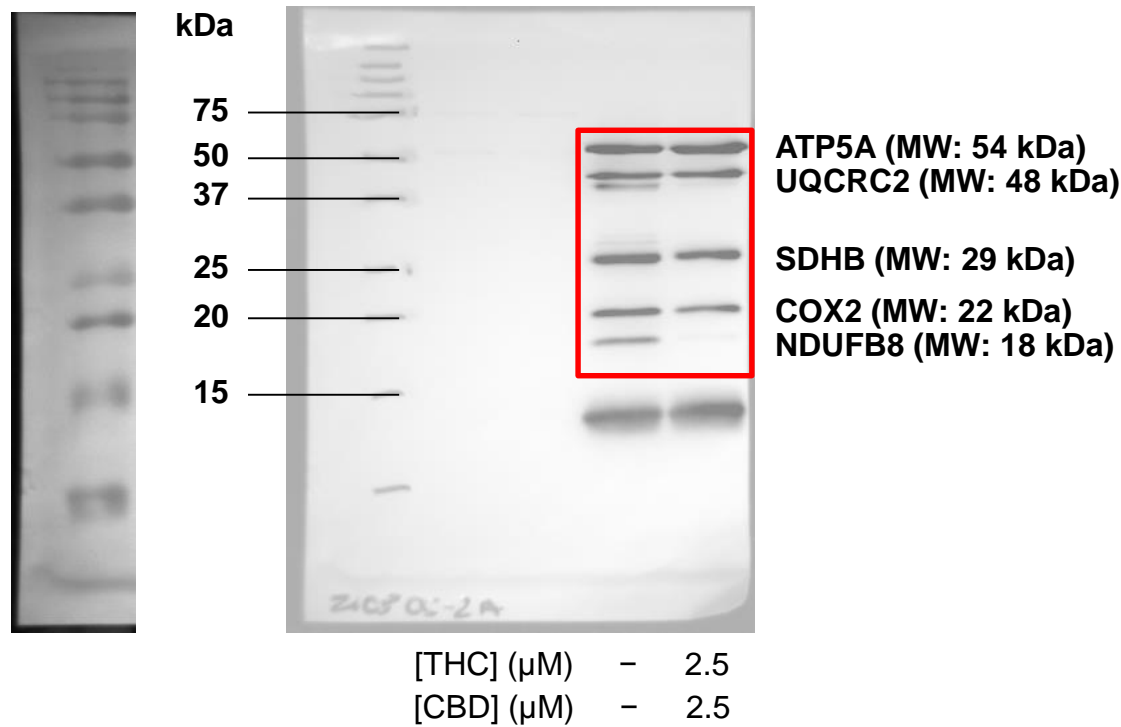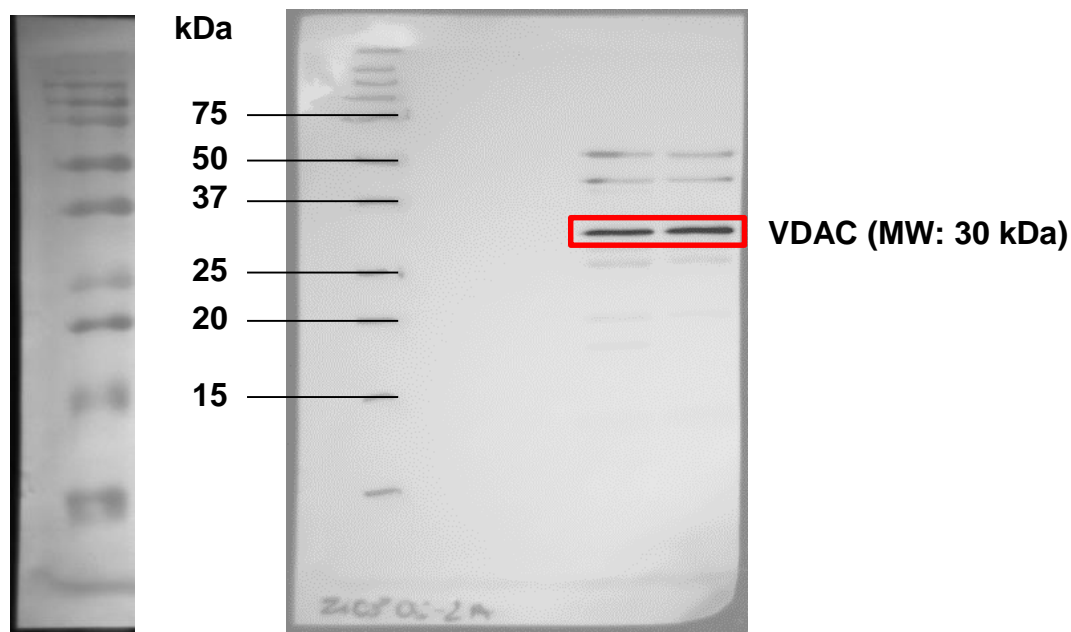

**Fig. 4F**

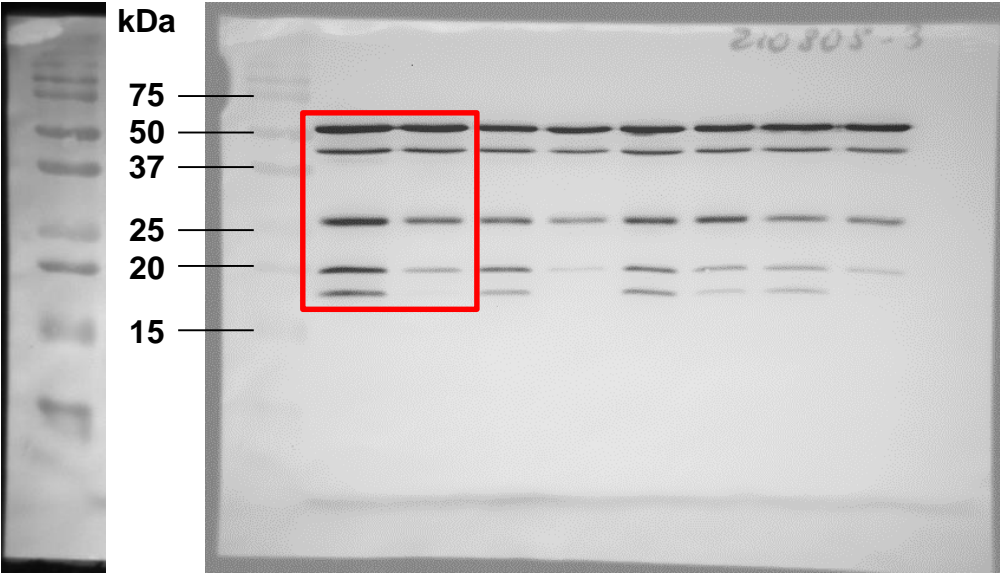

[THC] (μM) - 2.5  
[CBD] (μM) - 2.5

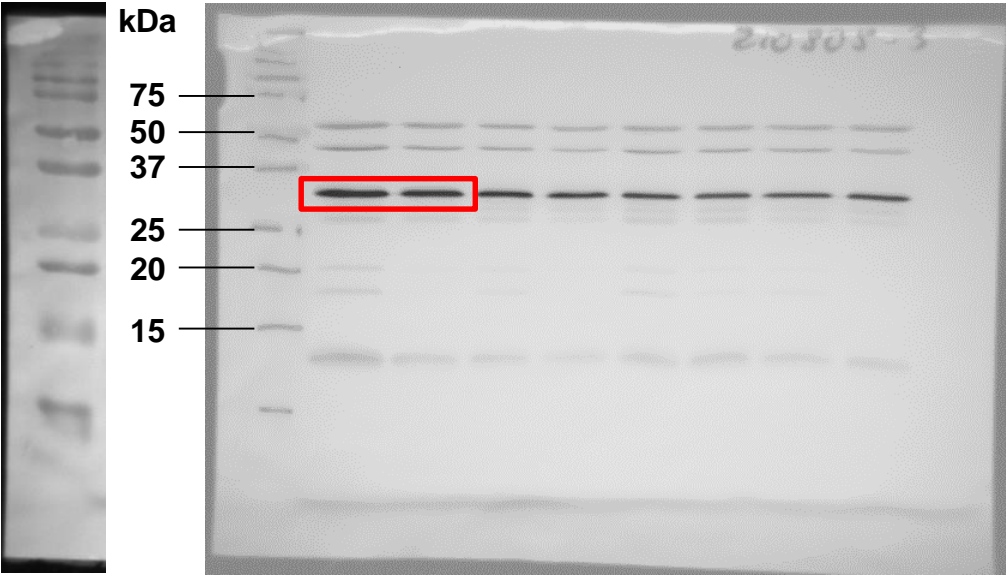

VDAC (MW: 30 kDa)

Fig. 5A

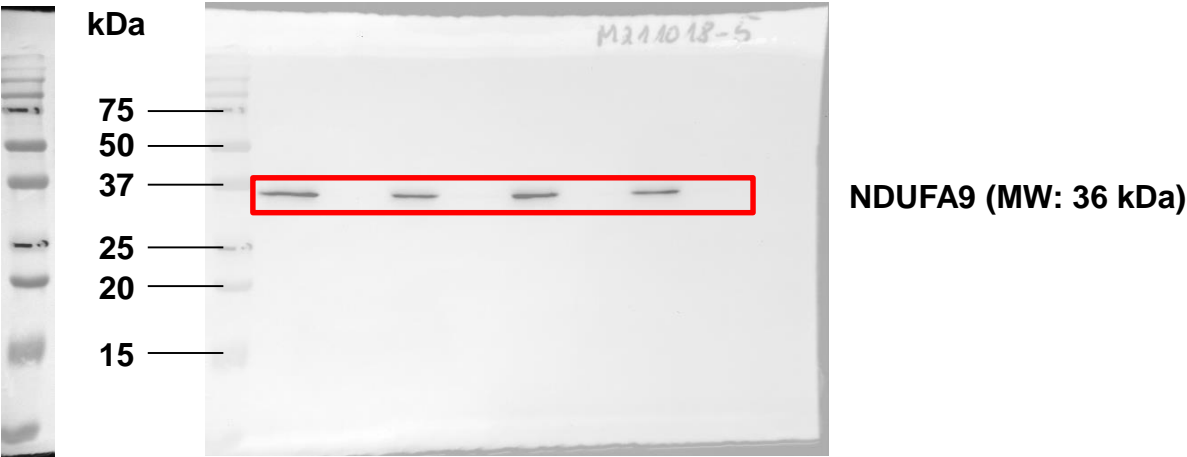

|               |   |     |     |     |     |     |     |     |
|---------------|---|-----|-----|-----|-----|-----|-----|-----|
| [THC] (μM)    | - | 2.5 | -   | 2.5 | -   | 2.5 | -   | 2.5 |
| [CBD] (μM)    | - | 2.5 | -   | 2.5 | -   | 2.5 | -   | 2.5 |
| [AM-251] (μM) | - | -   | 1.0 | 1.0 | -   | -   | -   | -   |
| [AM-630] (μM) | - | -   | -   | -   | 1.0 | 1.0 | -   | -   |
| [Capsa] (μM)  | - | -   | -   | -   | -   | -   | 1.0 | 1.0 |

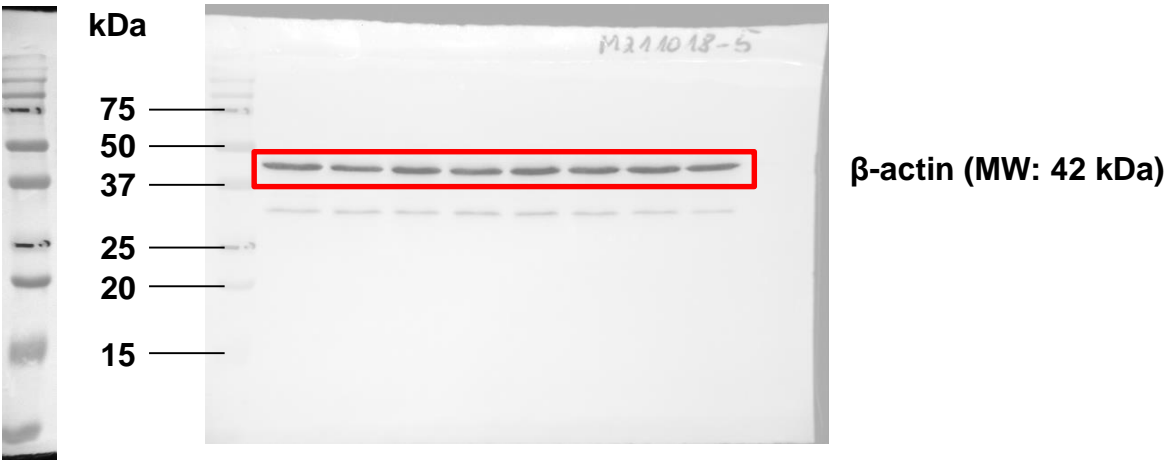

Fig. 5B

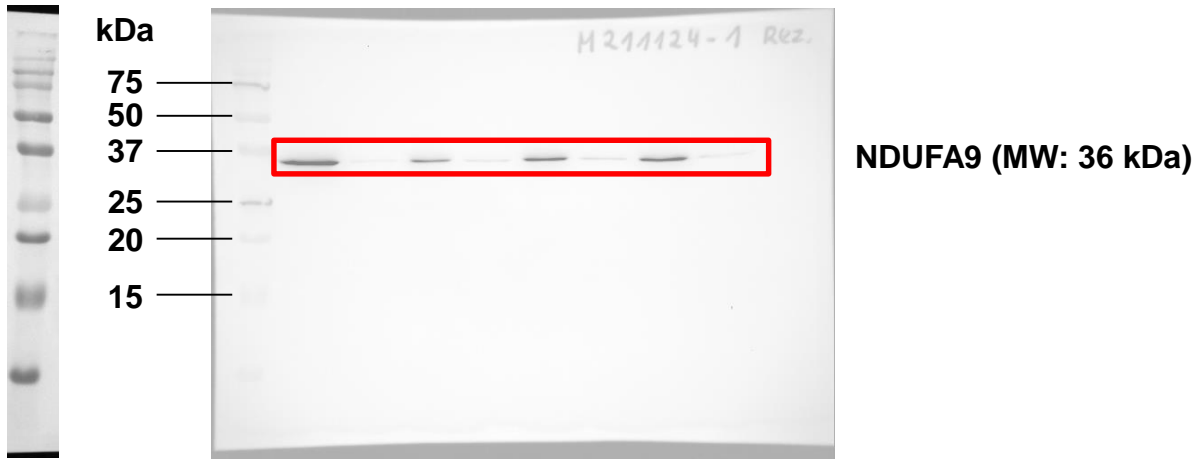

|               |   |     |     |     |     |     |     |     |
|---------------|---|-----|-----|-----|-----|-----|-----|-----|
| [THC] (μM)    | - | 2.5 | -   | 2.5 | -   | 2.5 | -   | 2.5 |
| [CBD] (μM)    | - | 2.5 | -   | 2.5 | -   | 2.5 | -   | 2.5 |
| [AM-251] (μM) | - | -   | 1.0 | 1.0 | -   | -   | -   | -   |
| [AM-630] (μM) | - | -   | -   | -   | 1.0 | 1.0 | -   | -   |
| [Capsa] (μM)  | - | -   | -   | -   | -   | -   | 1.0 | 1.0 |

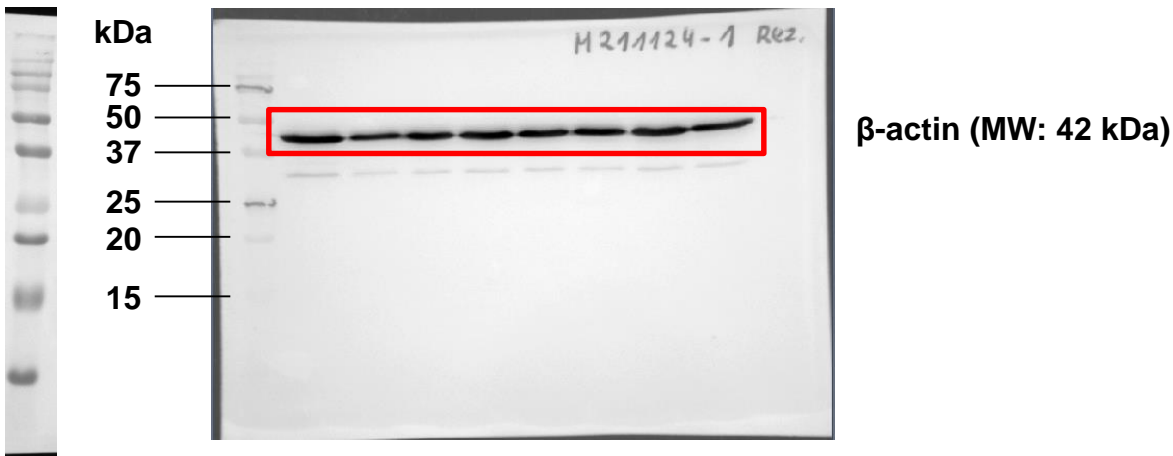



Fig. 5C

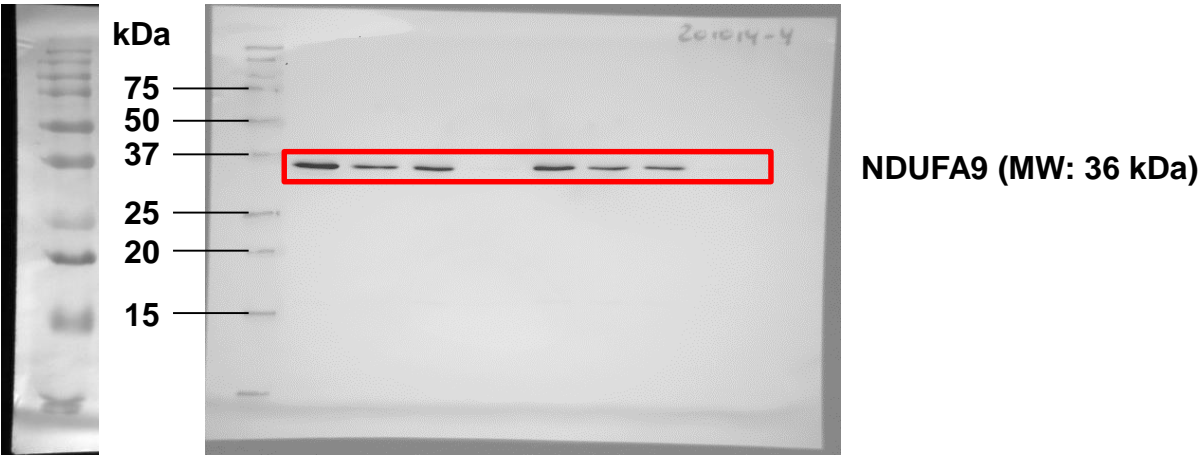

|            |   |     |     |     |     |     |     |     |
|------------|---|-----|-----|-----|-----|-----|-----|-----|
| [THC] (μM) | - | 2.5 | -   | 2.5 | -   | 2.5 | -   | 2.5 |
| [CBD] (μM) | - | -   | 2.5 | 2.5 | -   | -   | 2.5 | 2.5 |
| [Baf] (nM) | - | -   | -   | -   | 2.5 | 2.5 | 2.5 | 2.5 |

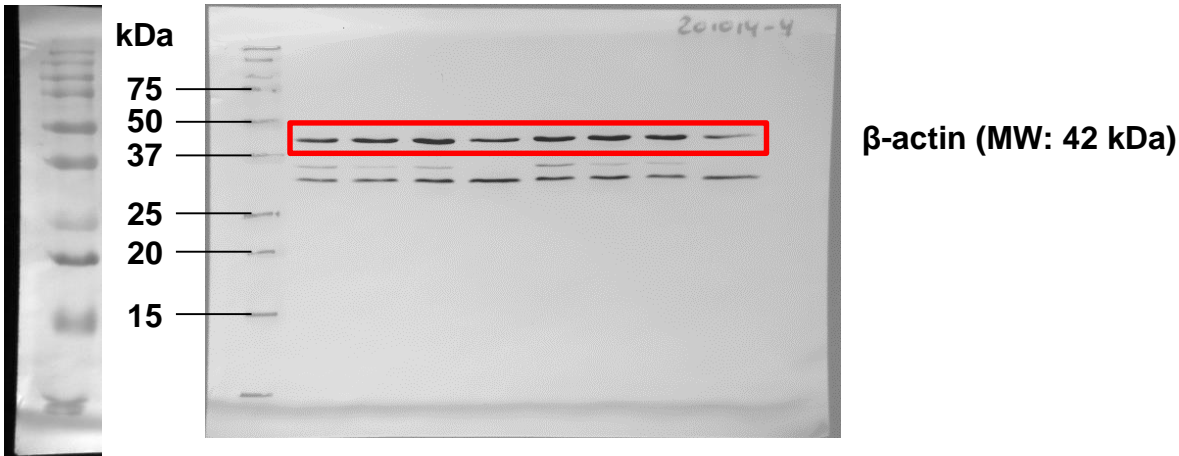

Fig. 5D

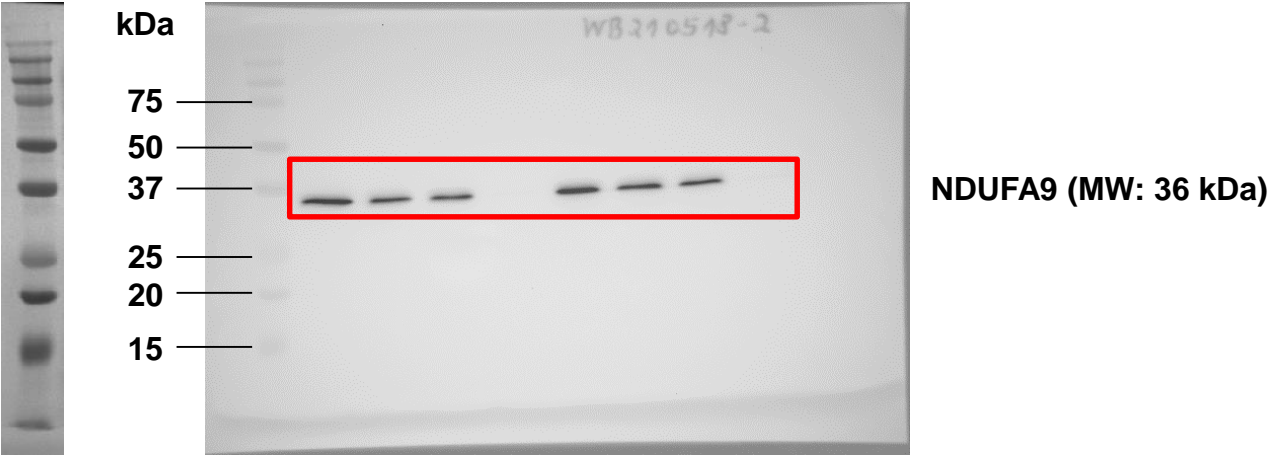

|            |   |     |     |     |     |     |     |     |
|------------|---|-----|-----|-----|-----|-----|-----|-----|
| [THC] (μM) | - | 2.5 | -   | 2.5 | -   | 2.5 | -   | 2.5 |
| [CBD] (μM) | - | -   | 2.5 | 2.5 | -   | -   | 2.5 | 2.5 |
| [Baf] (nM) | - | -   | -   | -   | 2.5 | 2.5 | 2.5 | 2.5 |

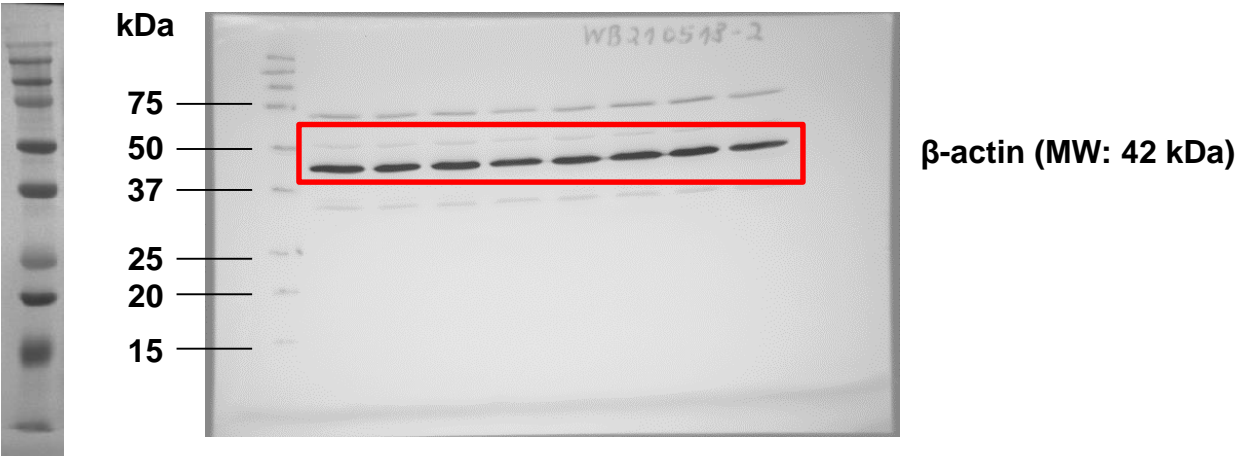

Fig. 5E

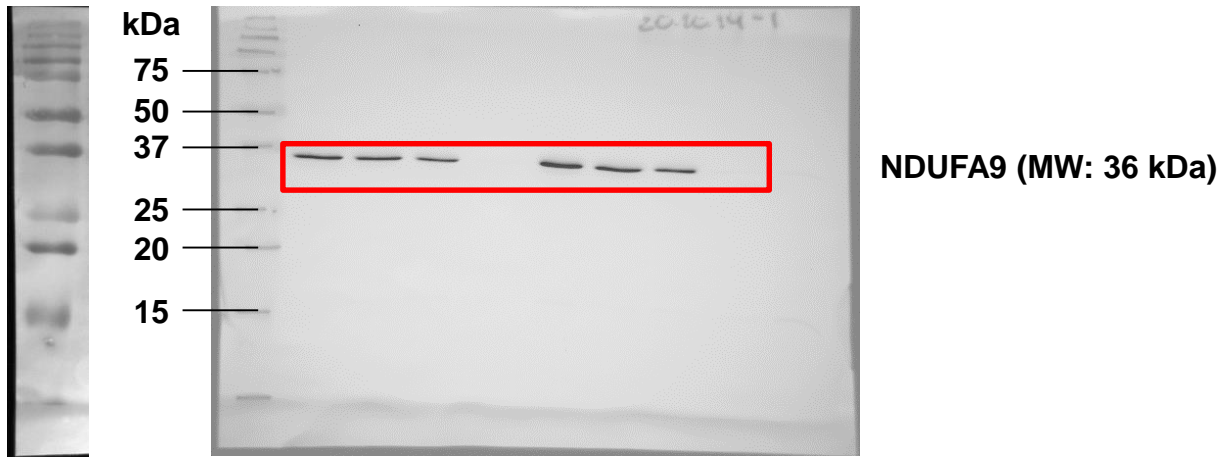

|            |   |     |     |     |    |     |     |     |
|------------|---|-----|-----|-----|----|-----|-----|-----|
| [THC] (μM) | - | 2.5 | -   | 2.5 | -  | 2.5 | -   | 2.5 |
| [CBD] (μM) | - | -   | 2.5 | 2.5 | -  | -   | 2.5 | 2.5 |
| [Bor] (μM) | - | -   | -   | -   | 10 | 10  | 10  | 10  |

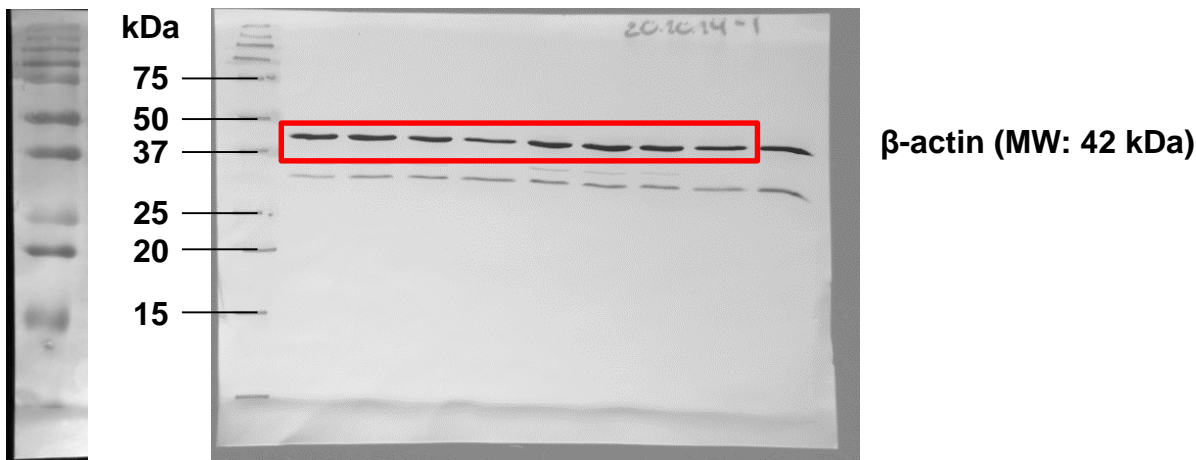

Fig. 5F

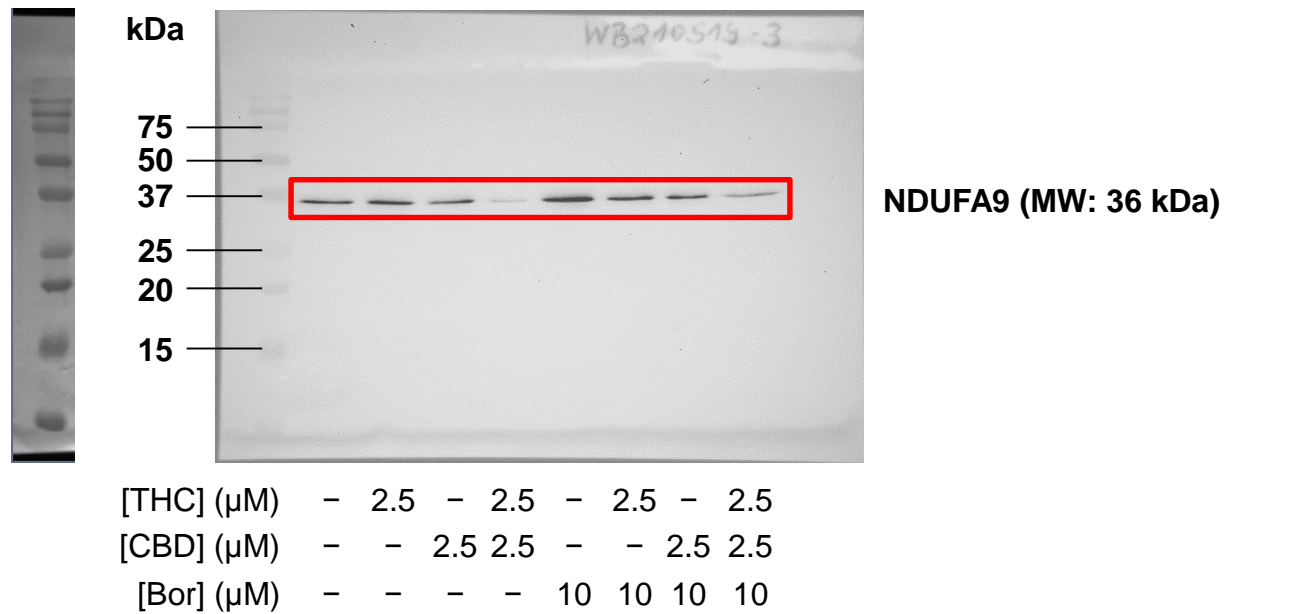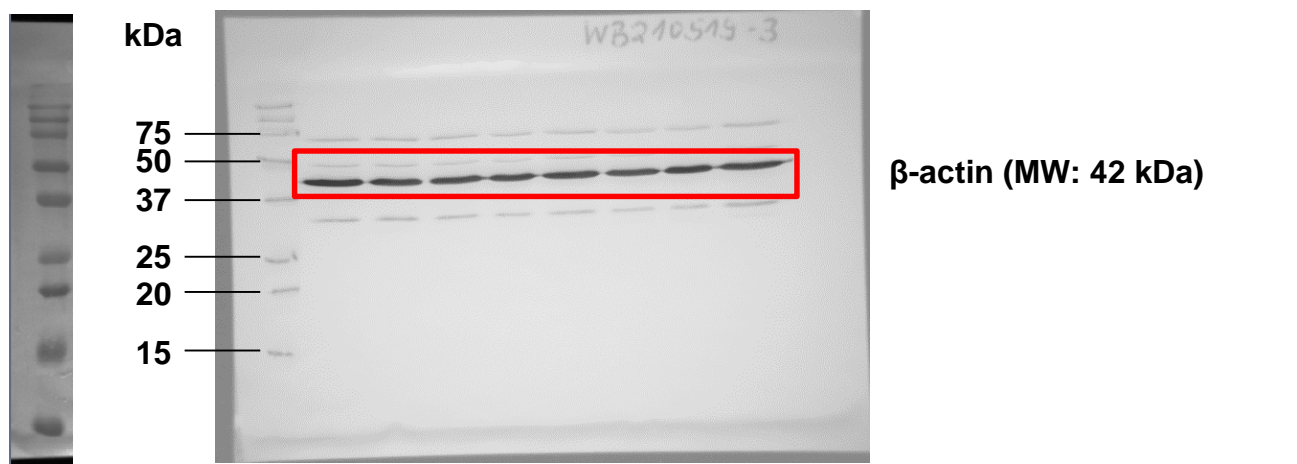

### Fig. 6C

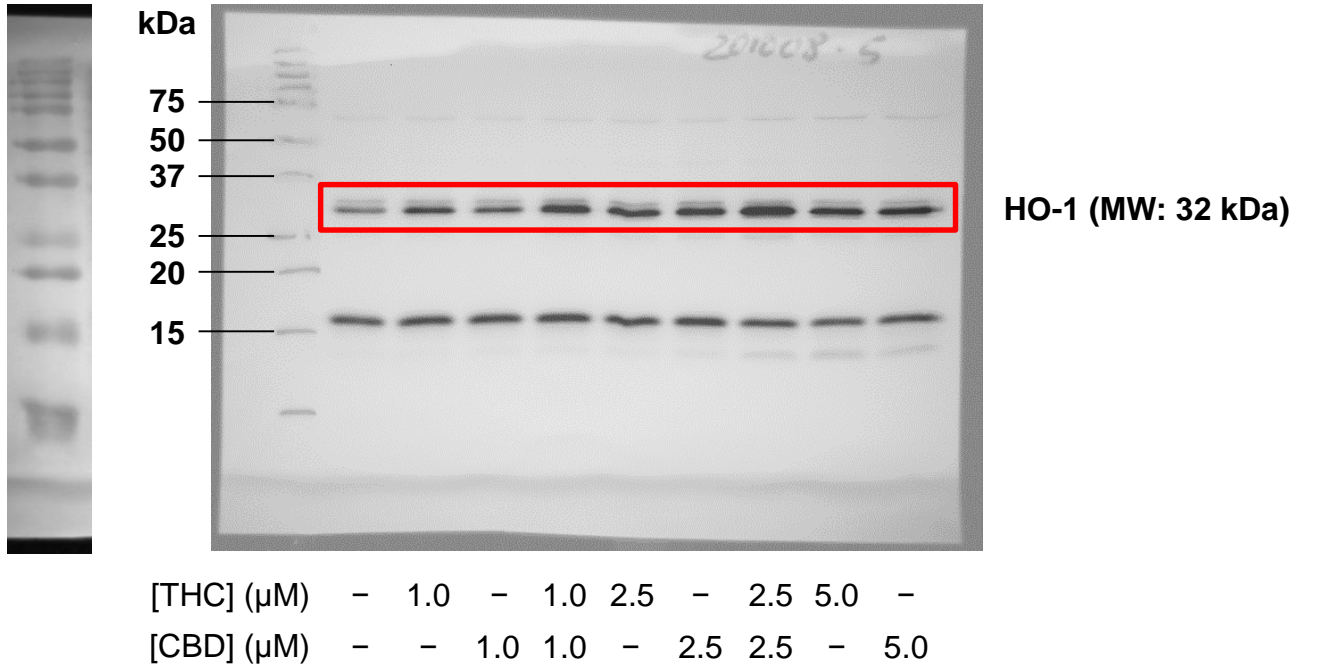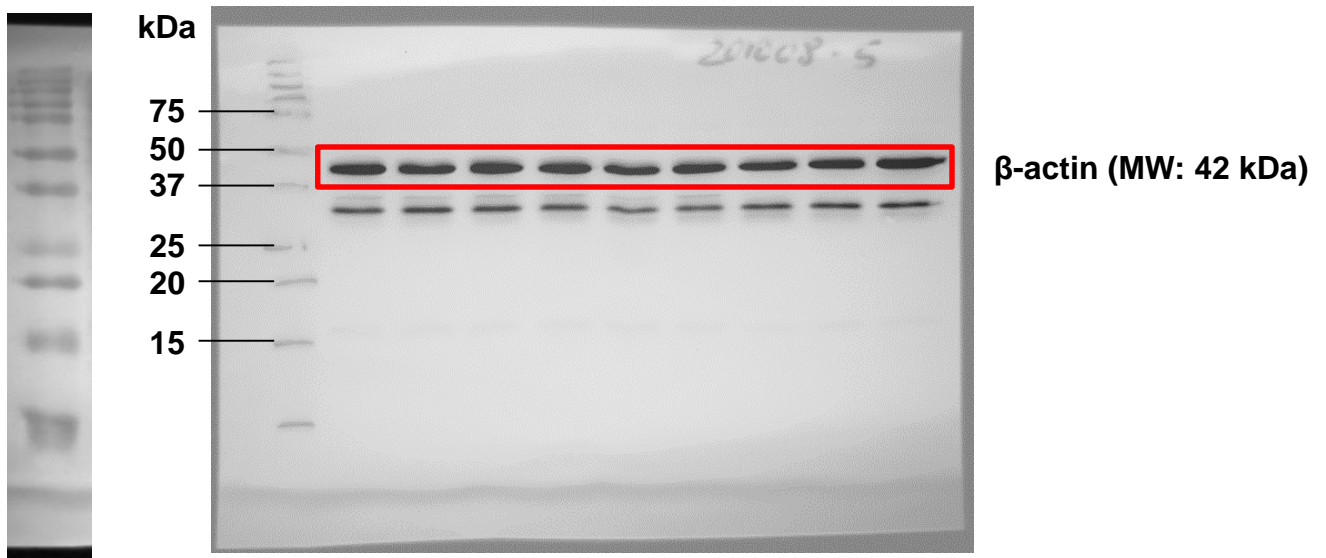



Fig. 6D

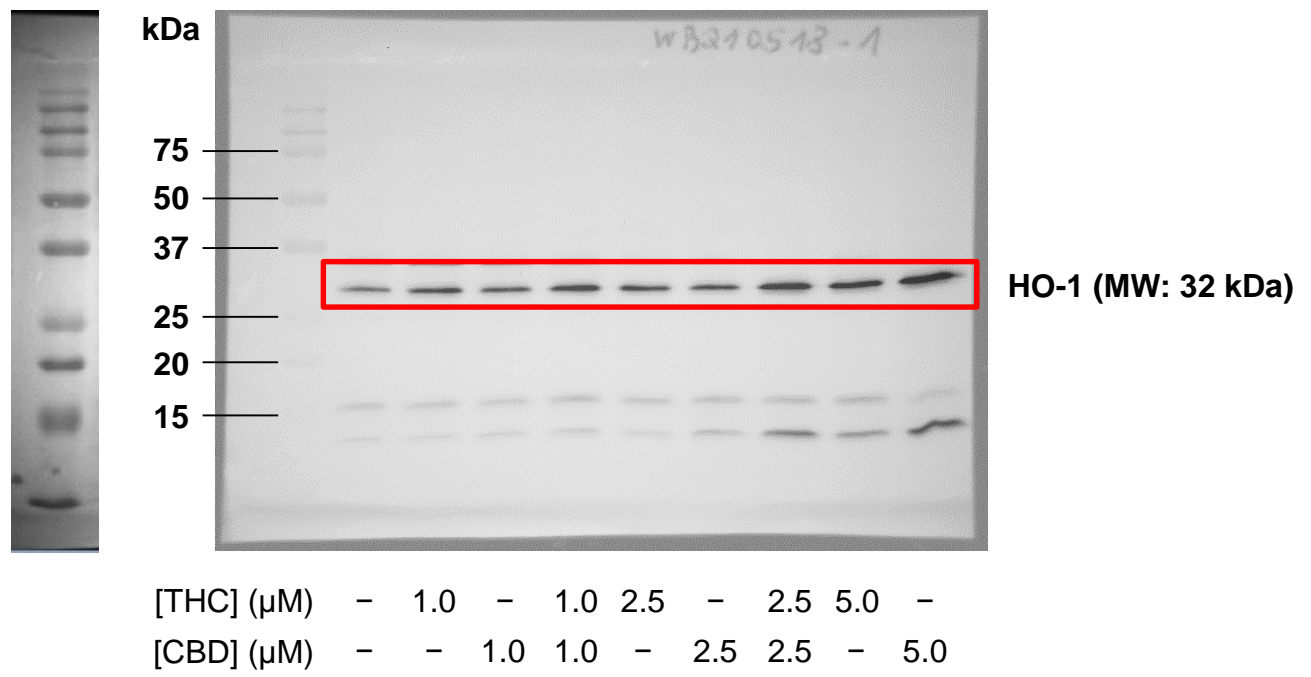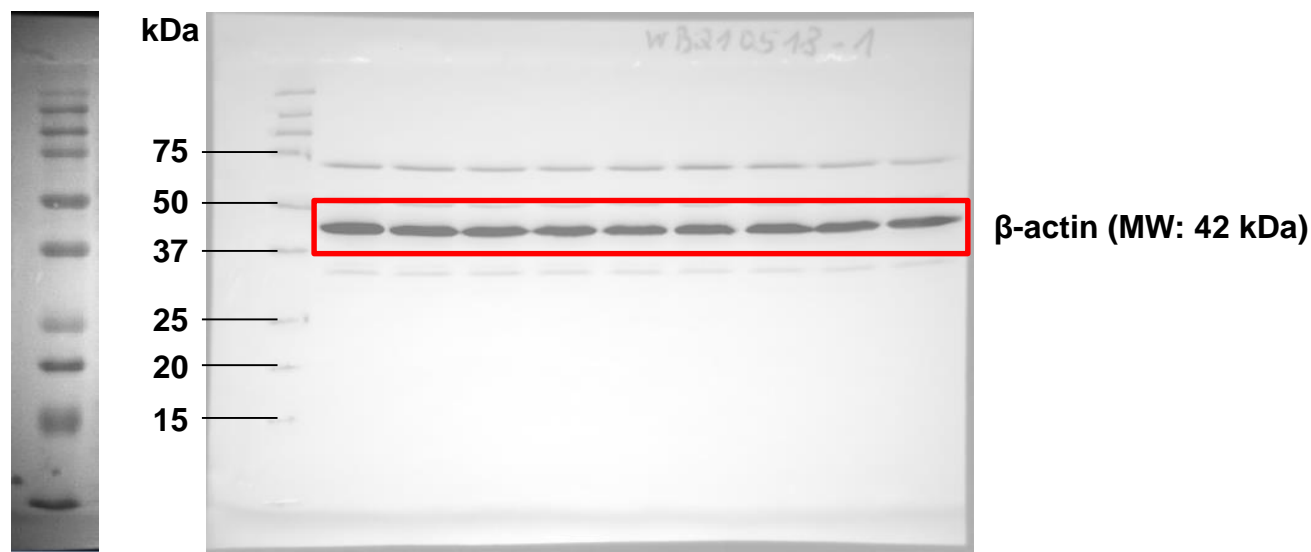

Fig. 6E

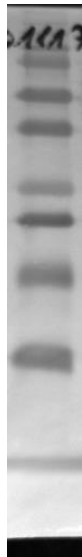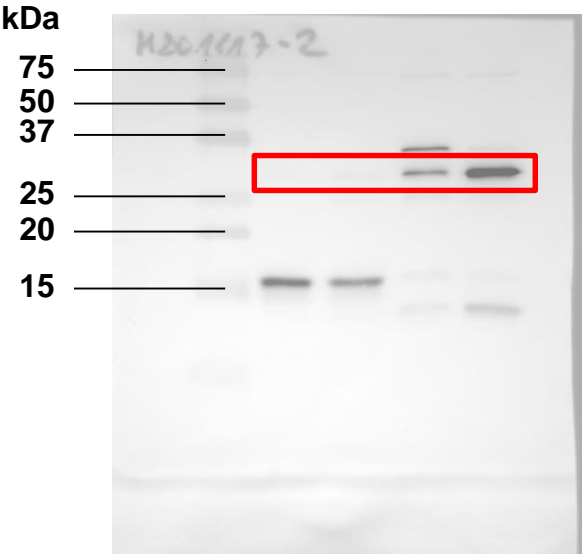

HO-1 (MW: 32 kDa)

|            |   |           |   |               |
|------------|---|-----------|---|---------------|
| [THC] (μM) | - | 2.5       | - | 2.5           |
| [CBD] (μM) | - | 2.5       | - | 2.5           |
|            |   | cytosolic |   | mitochondrial |

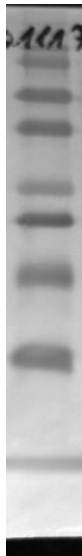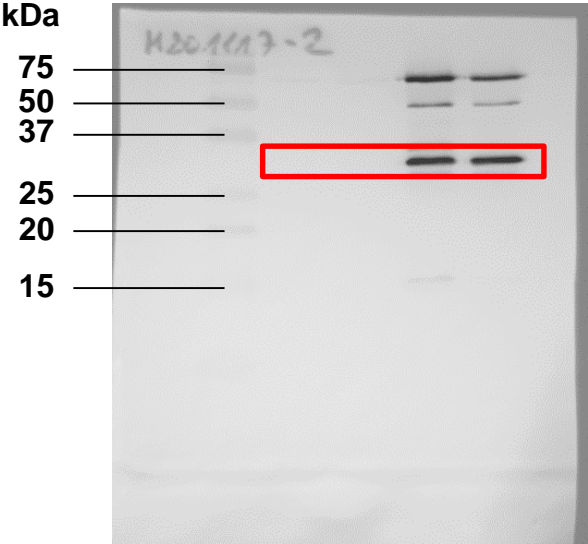

VDAC (MW: 30 kDa)

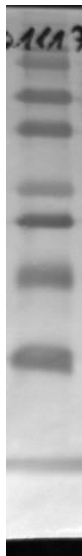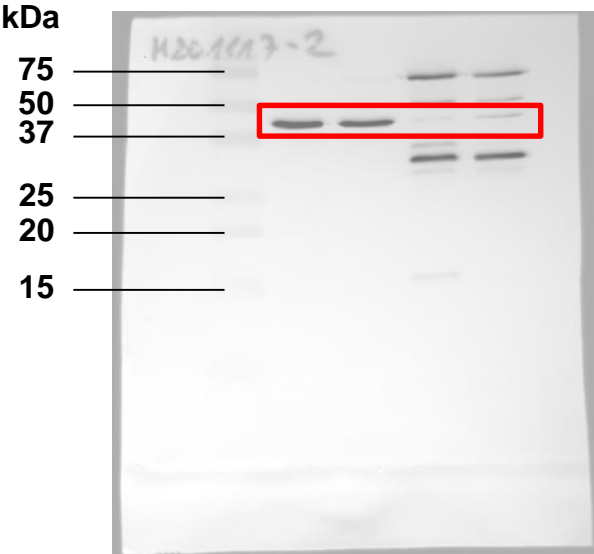

β-actin (MW: 42 kDa)

Fig. 6F

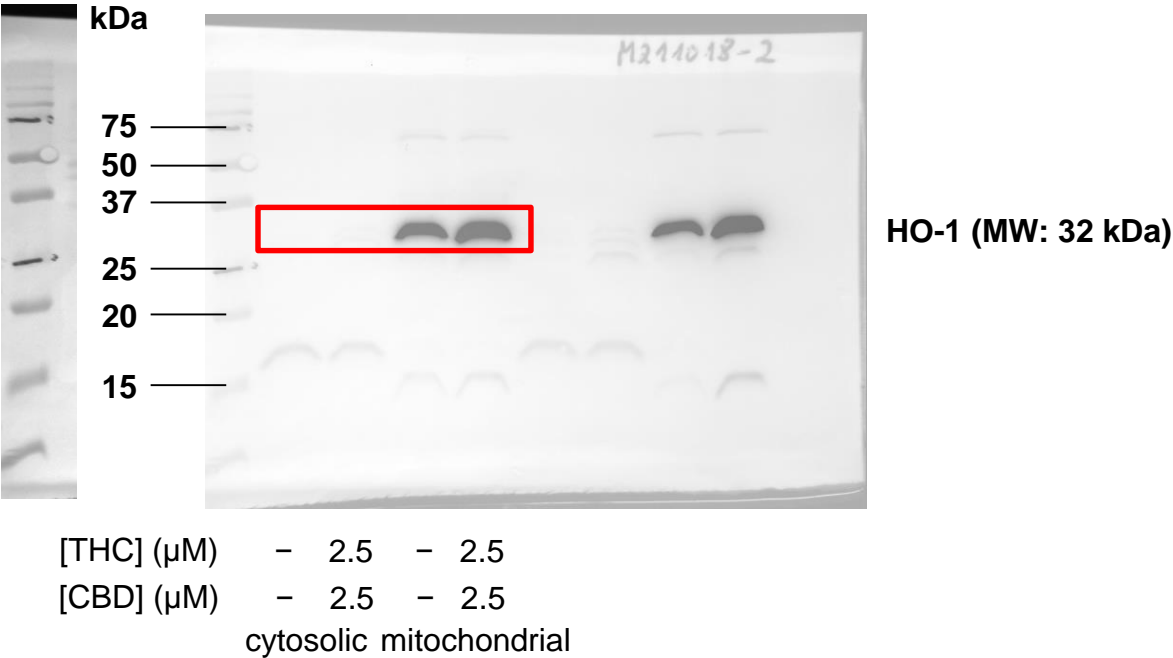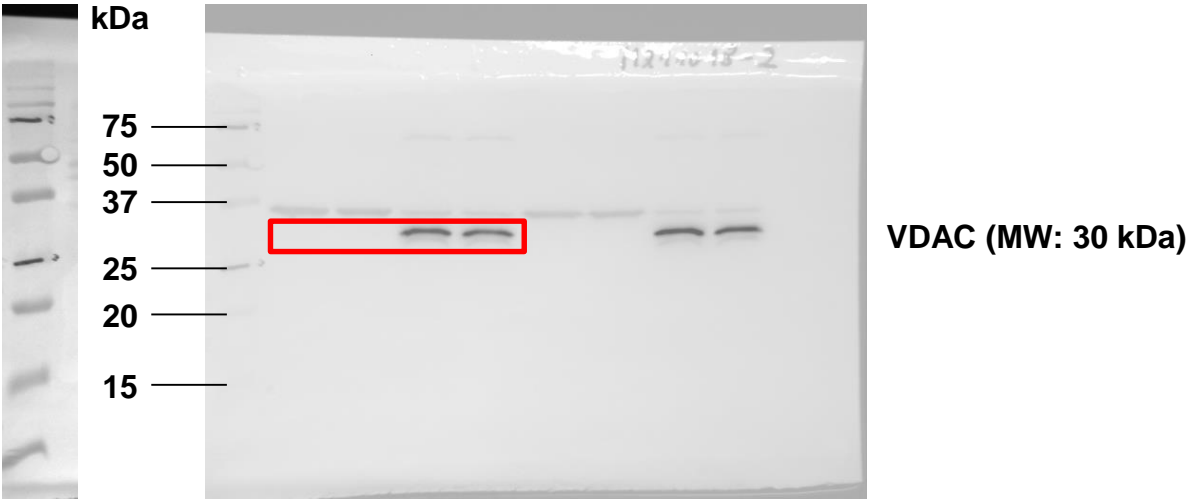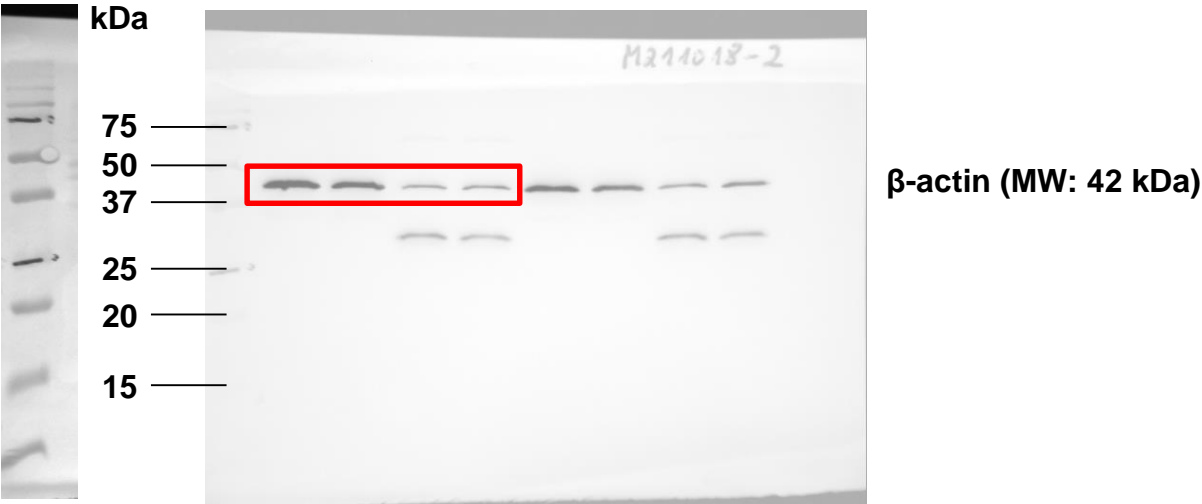

Fig. 6G

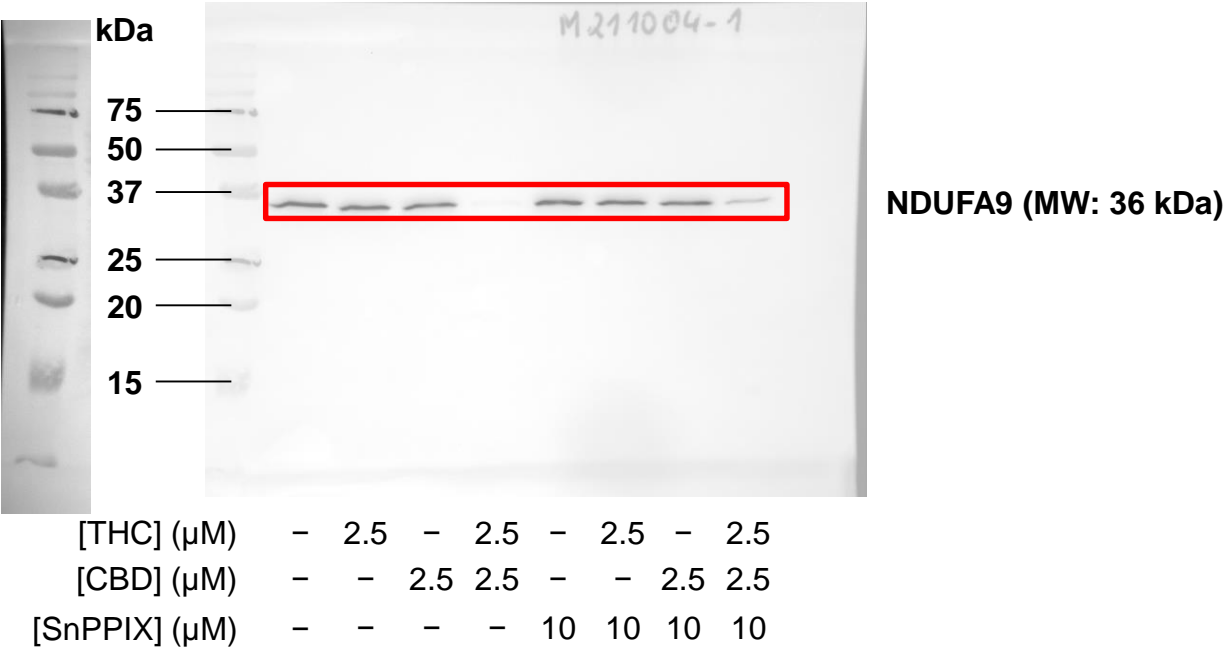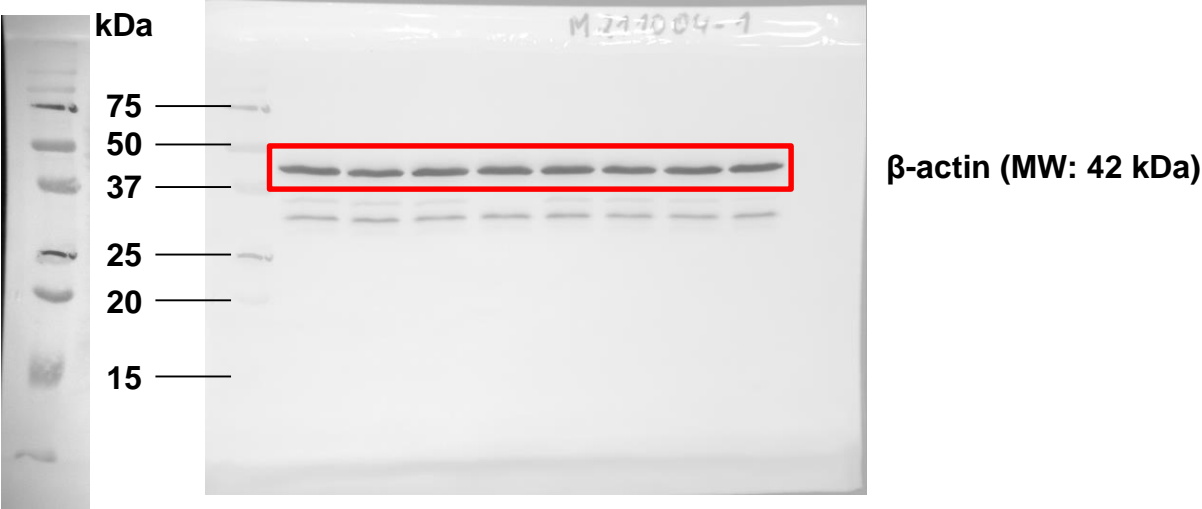

Fig. 6H

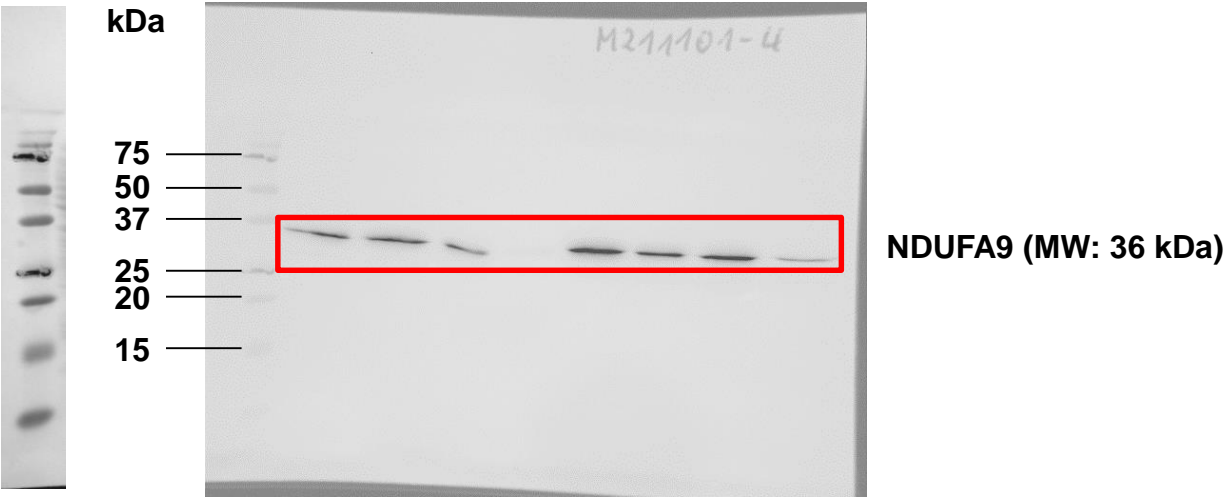

|               |   |     |     |     |    |     |     |     |
|---------------|---|-----|-----|-----|----|-----|-----|-----|
| [THC] (μM)    | - | 2.5 | -   | 2.5 | -  | 2.5 | -   | 2.5 |
| [CBD] (μM)    | - | -   | 2.5 | 2.5 | -  | -   | 2.5 | 2.5 |
| [SnPPIX] (μM) | - | -   | -   | -   | 10 | 10  | 10  | 10  |

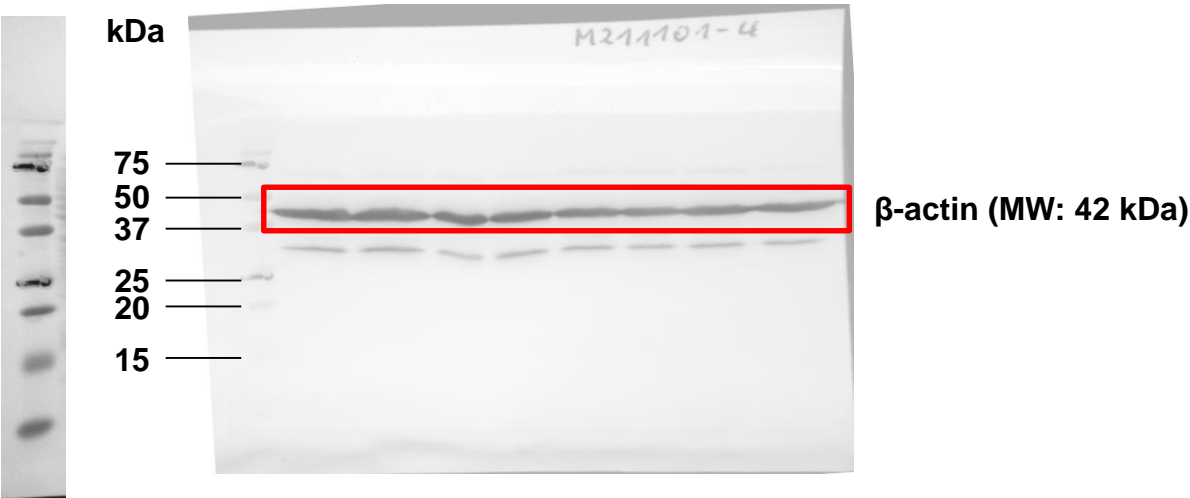

Fig. S2

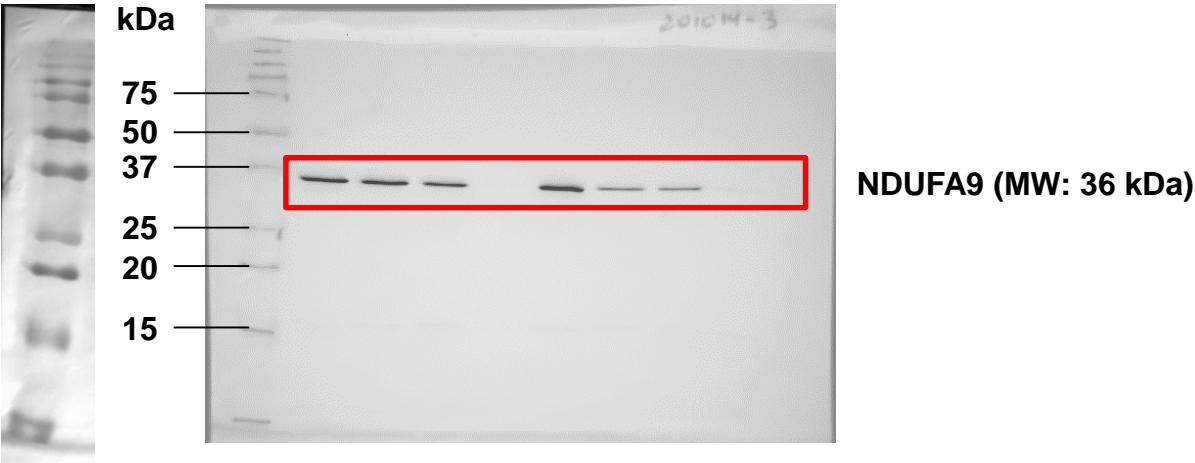

|               |   |     |     |     |    |     |     |     |
|---------------|---|-----|-----|-----|----|-----|-----|-----|
| [THC] (μM)    | - | 2.5 | -   | 2.5 | -  | 2.5 | -   | 2.5 |
| [CBD] (μM)    | - | -   | 2.5 | 2.5 | -  | -   | 2.5 | 2.5 |
| [MG-132] (μM) | - | -   | -   | -   | 10 | 10  | 10  | 10  |

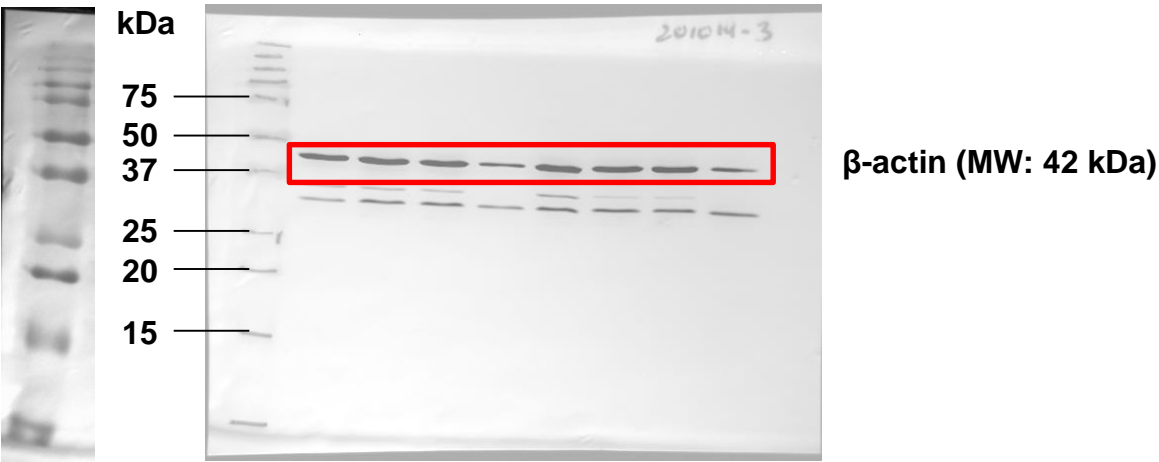



Fig. S3A

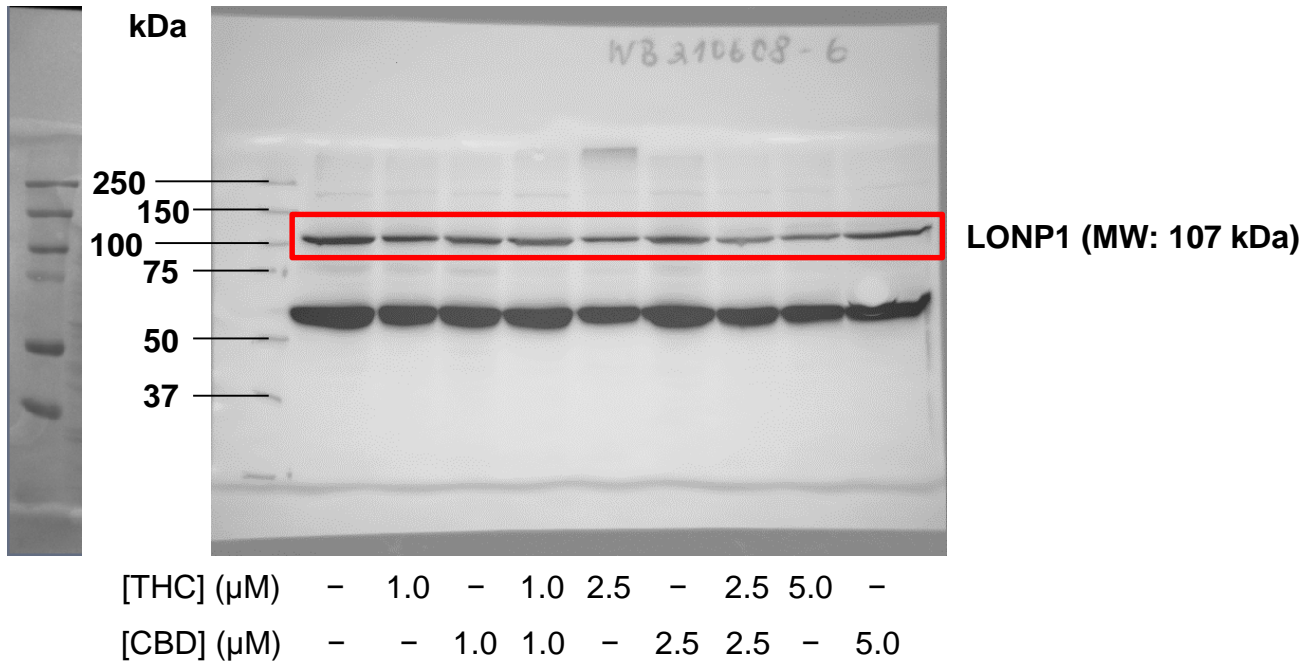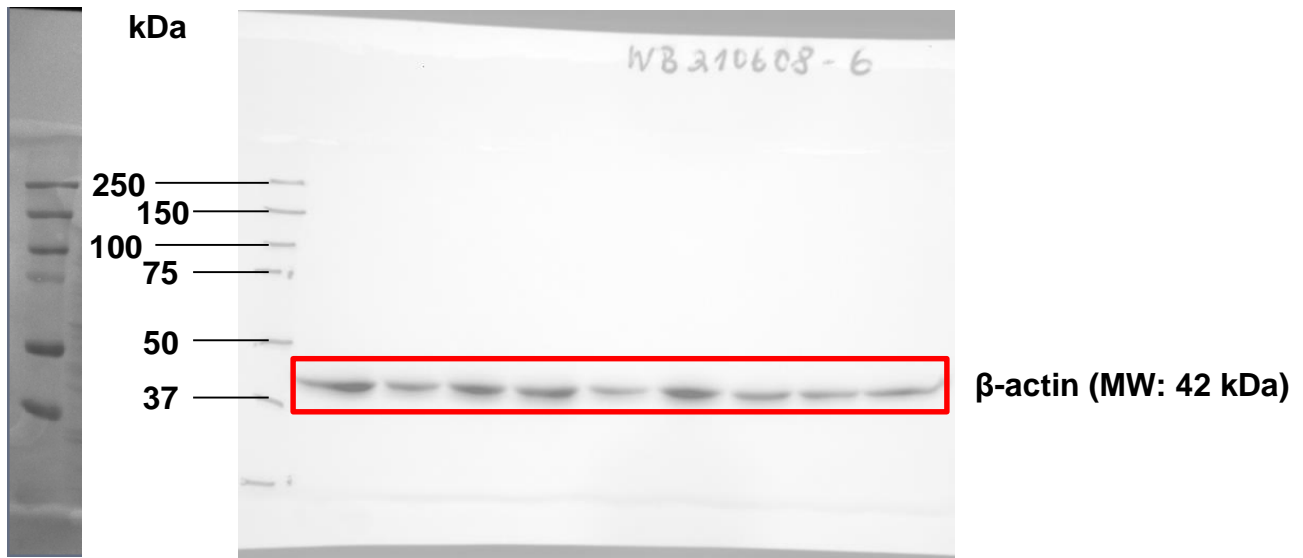

Fig. S3B

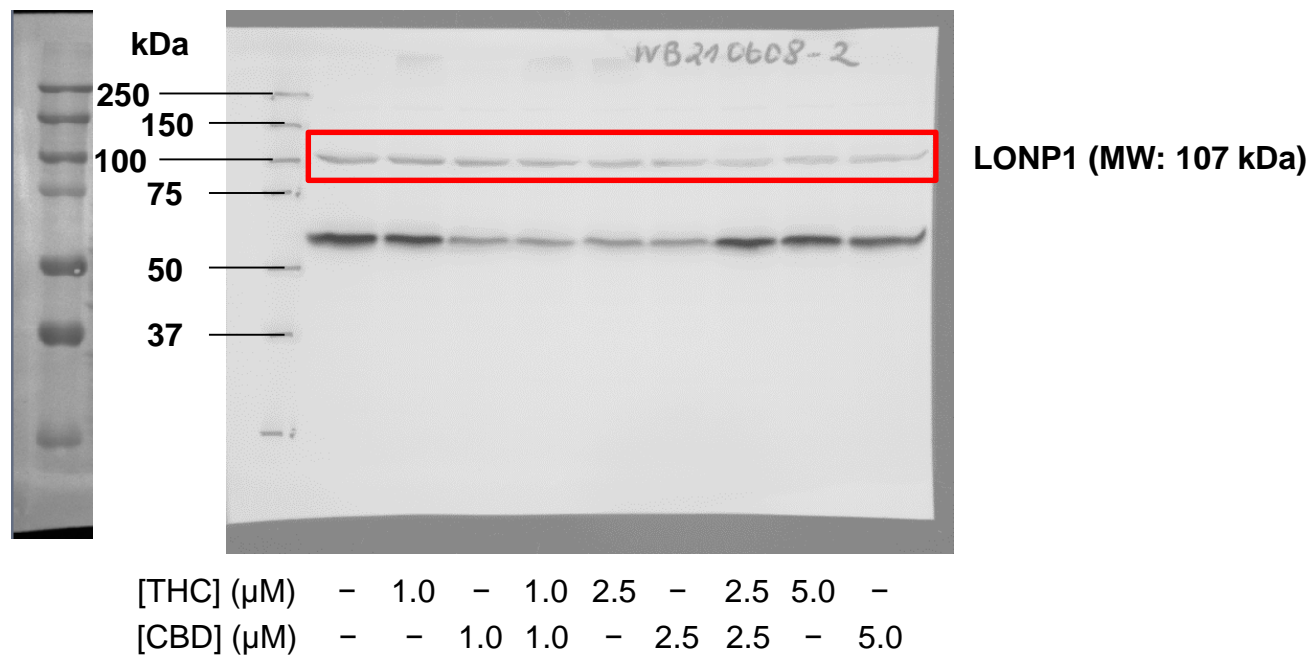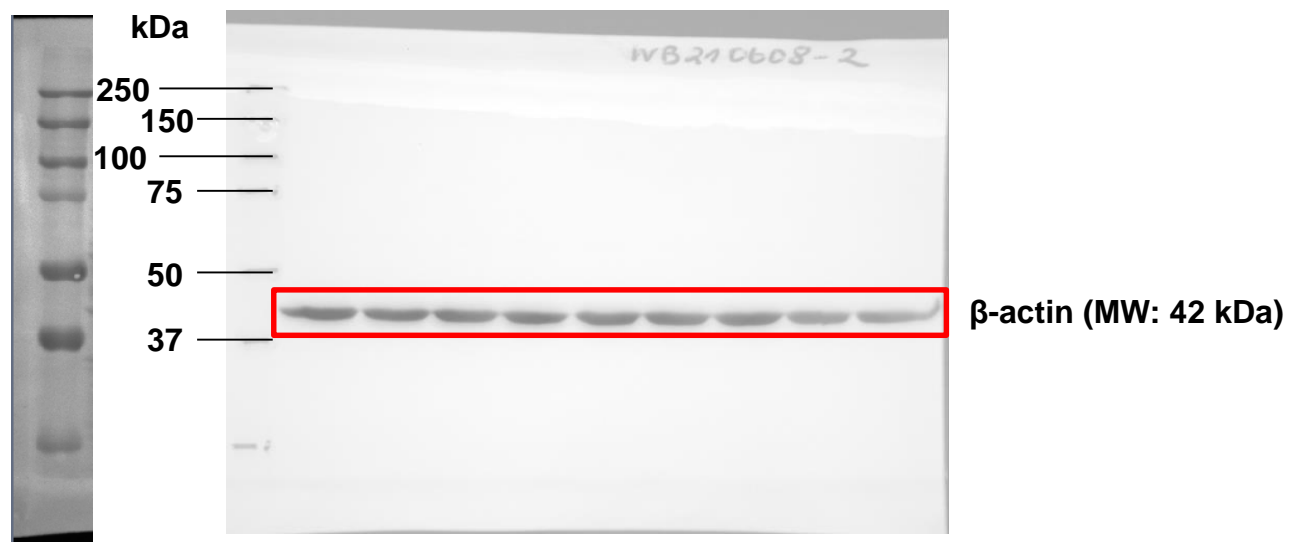

Supplement: s1 [file s1]
